# Supplementary material for: Poly(ADP)-Ribosylation Inhibition: A Promising Approach for Clear Cell Renal Cell Carcinoma Therapy
Source: MDPI journal article supplement (doi:10.3390/cancers13194973), 2021-10-03
Supplement: s1 [file s1]

# Supplementary Materials: Poly(ADP)-Ribosylation Inhibition: A Promising Approach for Clear Cell Renal Cell Carcinoma Therapy

Yaroslava Karpova, Danping Guo, Peter Makhov, Adam M. Haines, Dmitriy A. Markov, Vladimir Kolenko and Alexei V. Tulin

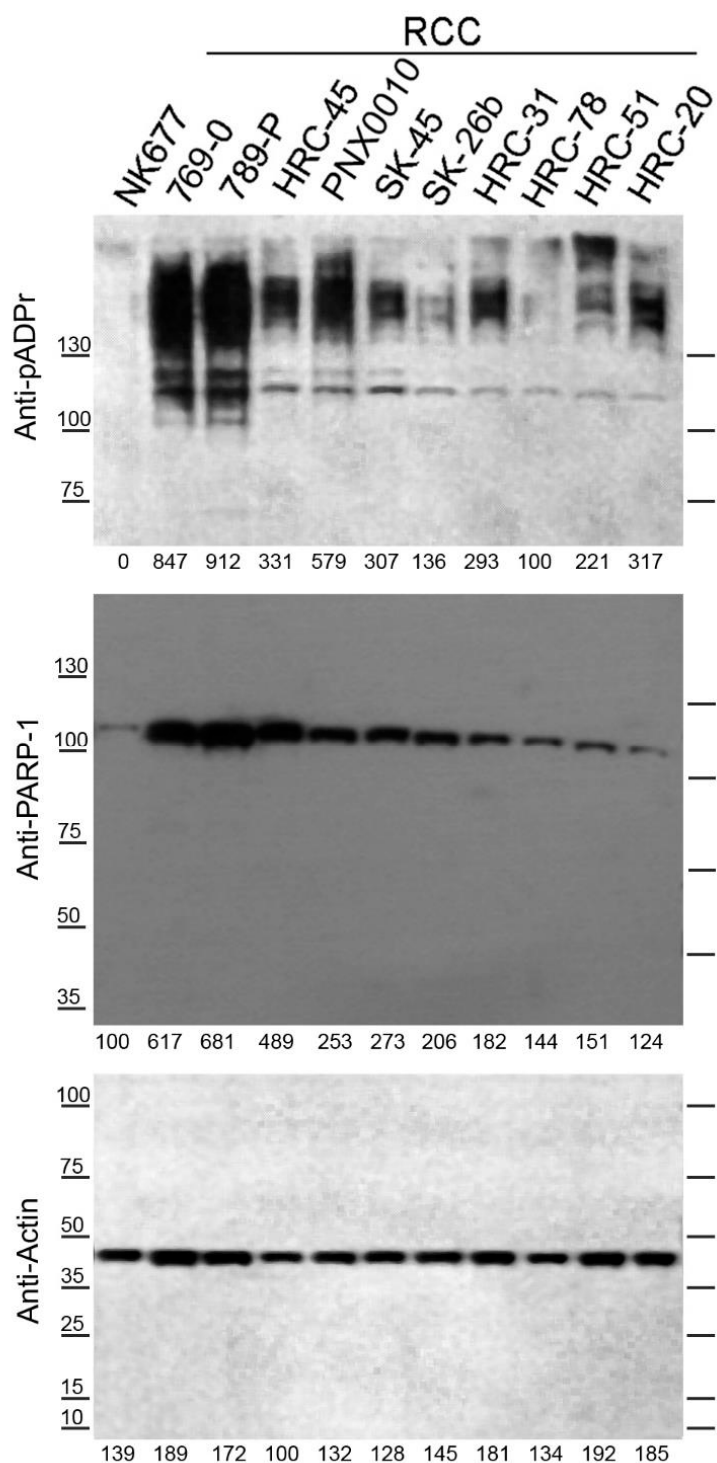

(A)

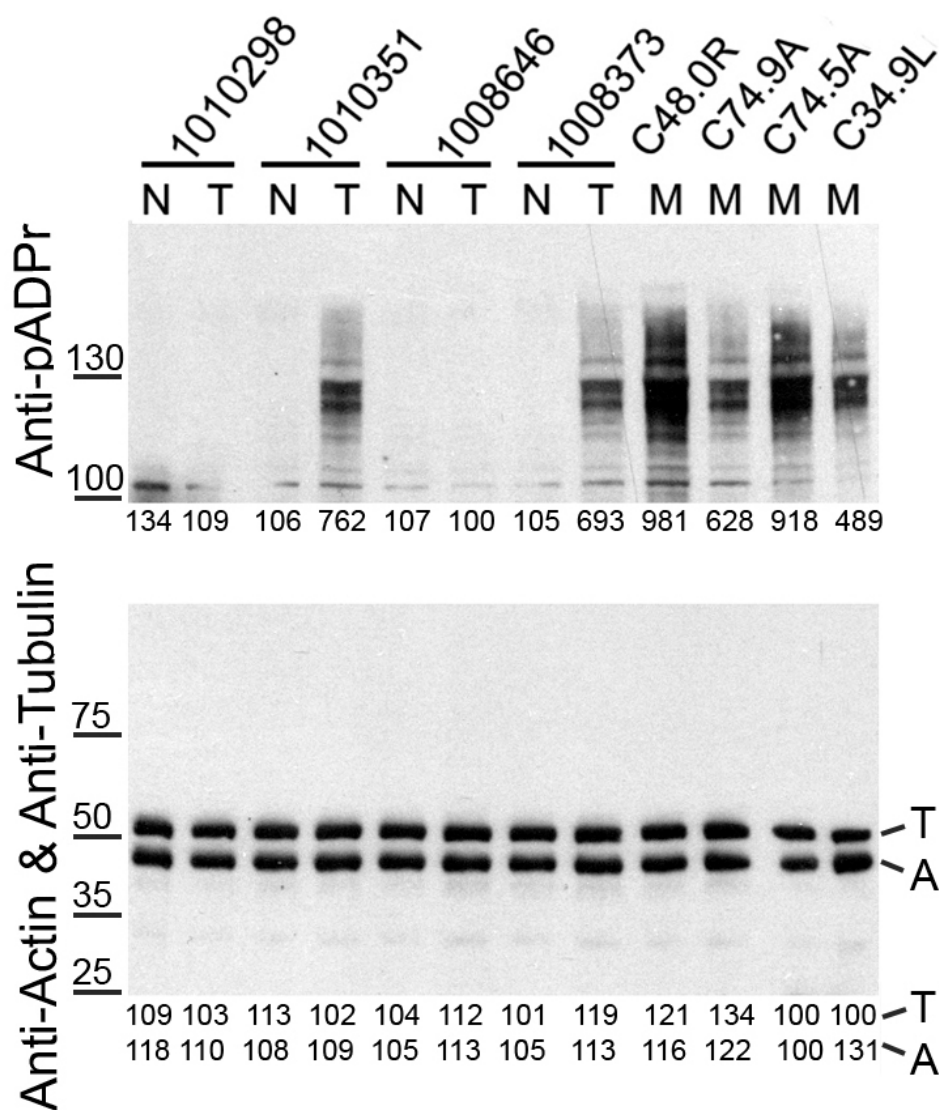

(B)

**Figure S1.** ccRCC cell lines and tumors affected by pADPr turnover. Western blot analysis for pADPr and PARP-1 in ccRCC cell lines (A) and patient-derived tumors (B). "N", "T", and "M" indicate "normal", "tumor" and "metastatic" samples, respectively. All studied ccRCC samples demonstrate a high level of pADPr. Actin and Tubulin levels are shown as a loading control.

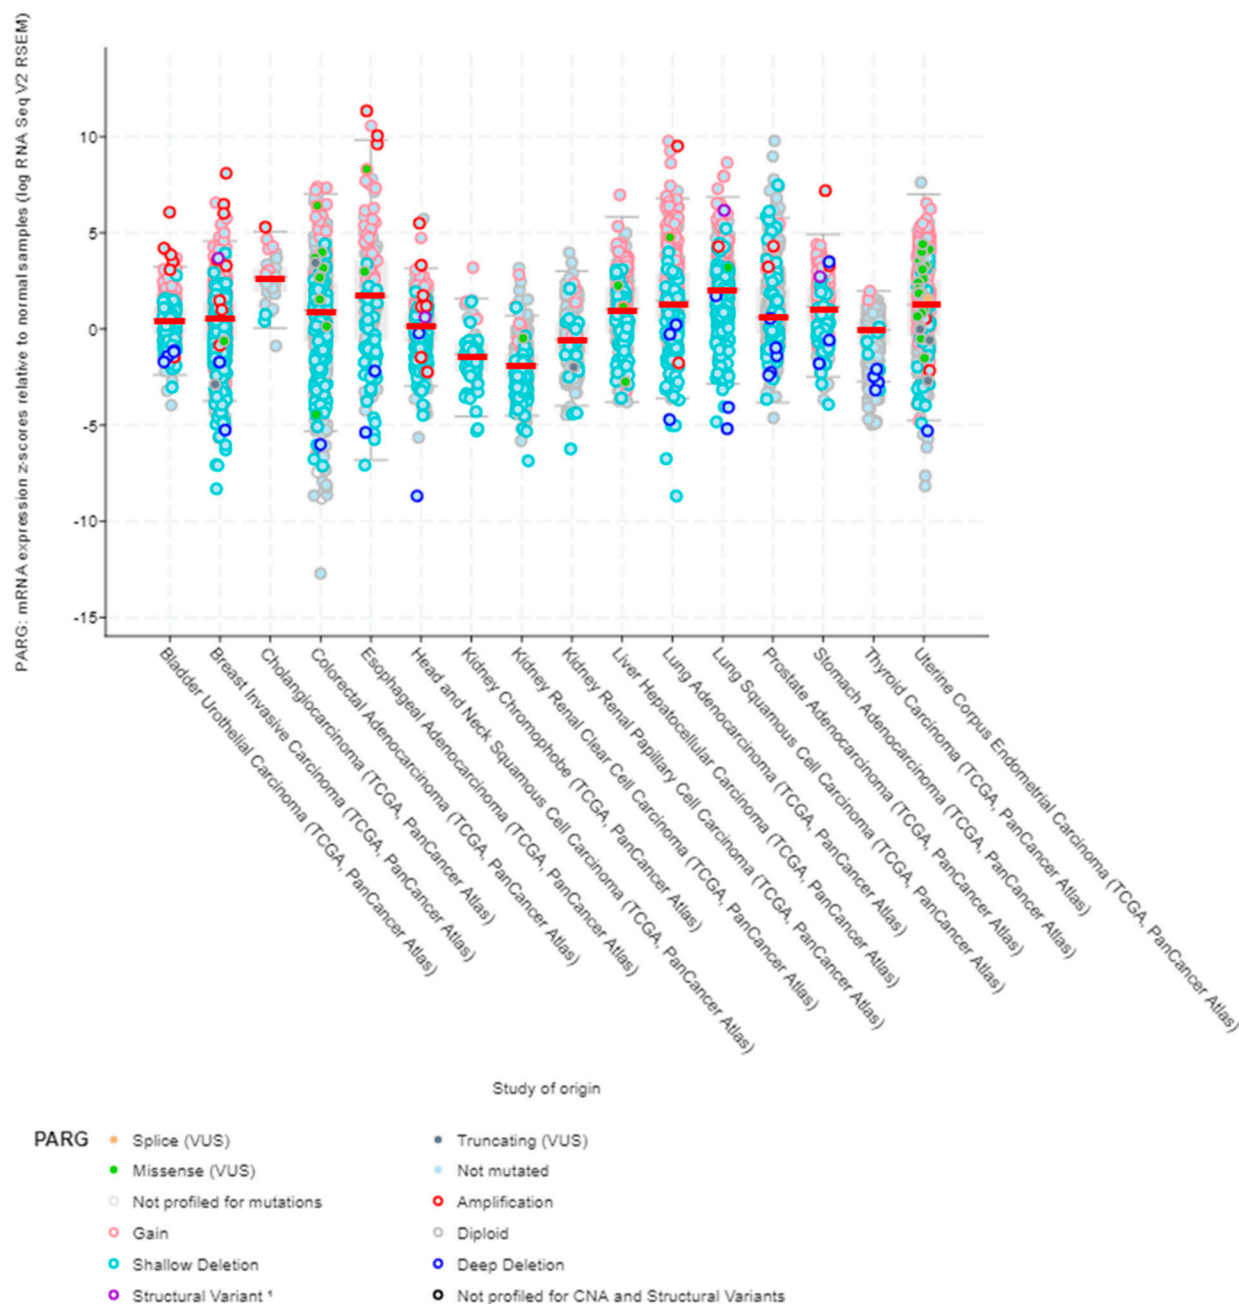

**Figure S2.** ccRCC (red box) exhibit the most severe downregulation of mRNA expression in tumor relative to normal samples. Graph generated at cBioPortal (<https://www.cbioportal.org/>) for TCGA PanCancer Atlas RNA sequencing data for different types of cancer and corresponding normal tissue.

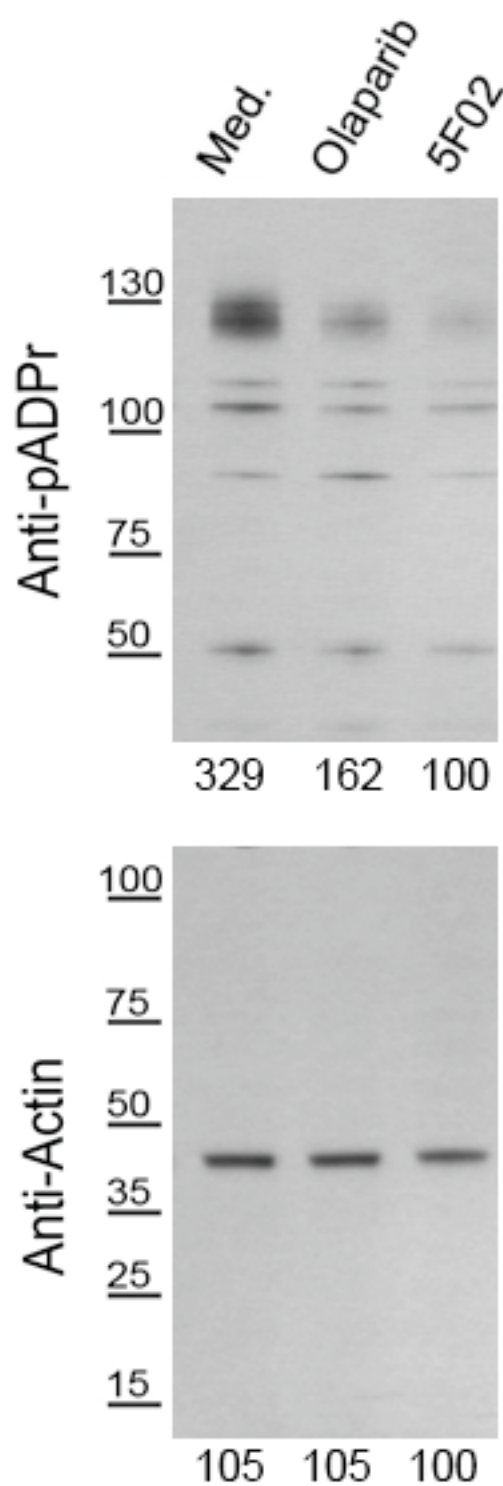

**Figure S3.** Western blot analysis shows the reduction of pADPr level in tumors upon olaparib and 5F02 PARPs inhibition. Actin level is shown as loading control.



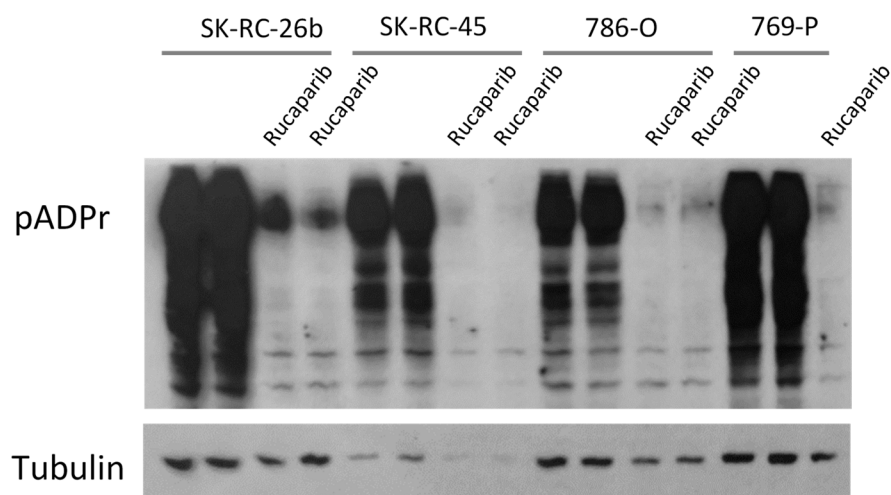

**Figure S4.** pADPr inhibition in ccRCC cell lines treated with 10 uM rucaparib for 48 h. Tubulin level is shown as a loading control.

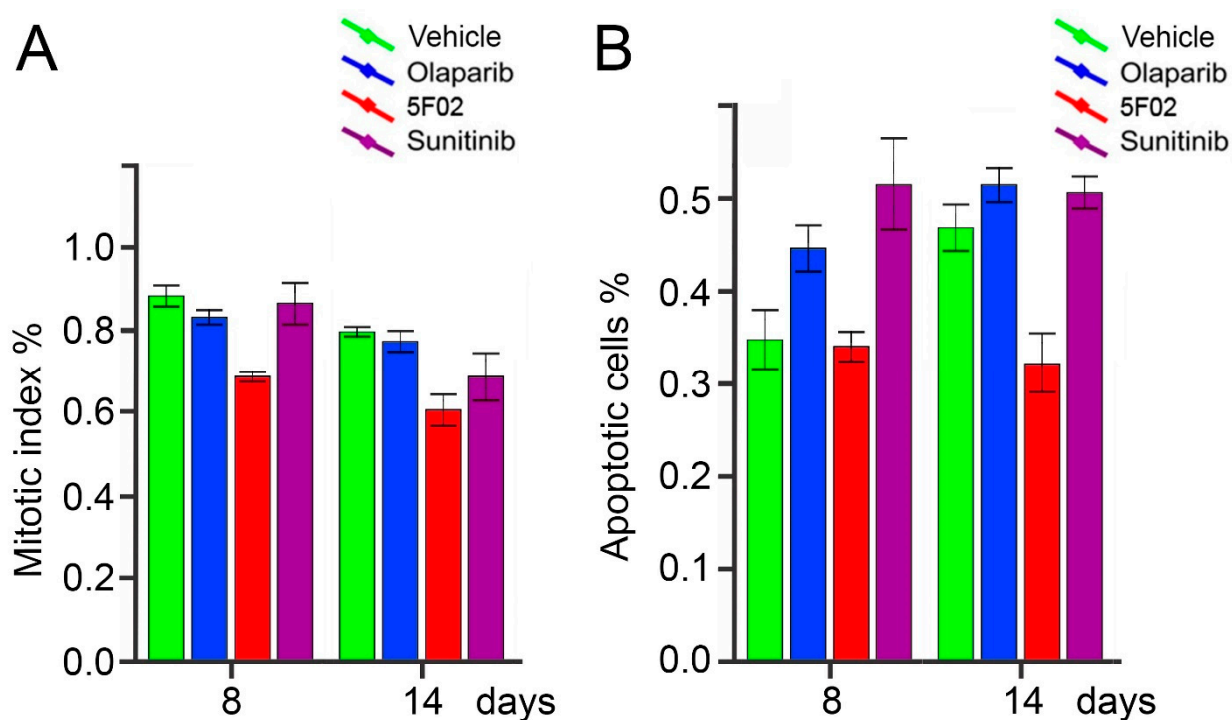

**Figure S5.** Proliferation index (A) and apoptosis level (B) in PNx0010 derived xenograft tumors 8 days and 14 days after tumor induction. Error bars correspond to standard deviation based on 8 repeats.

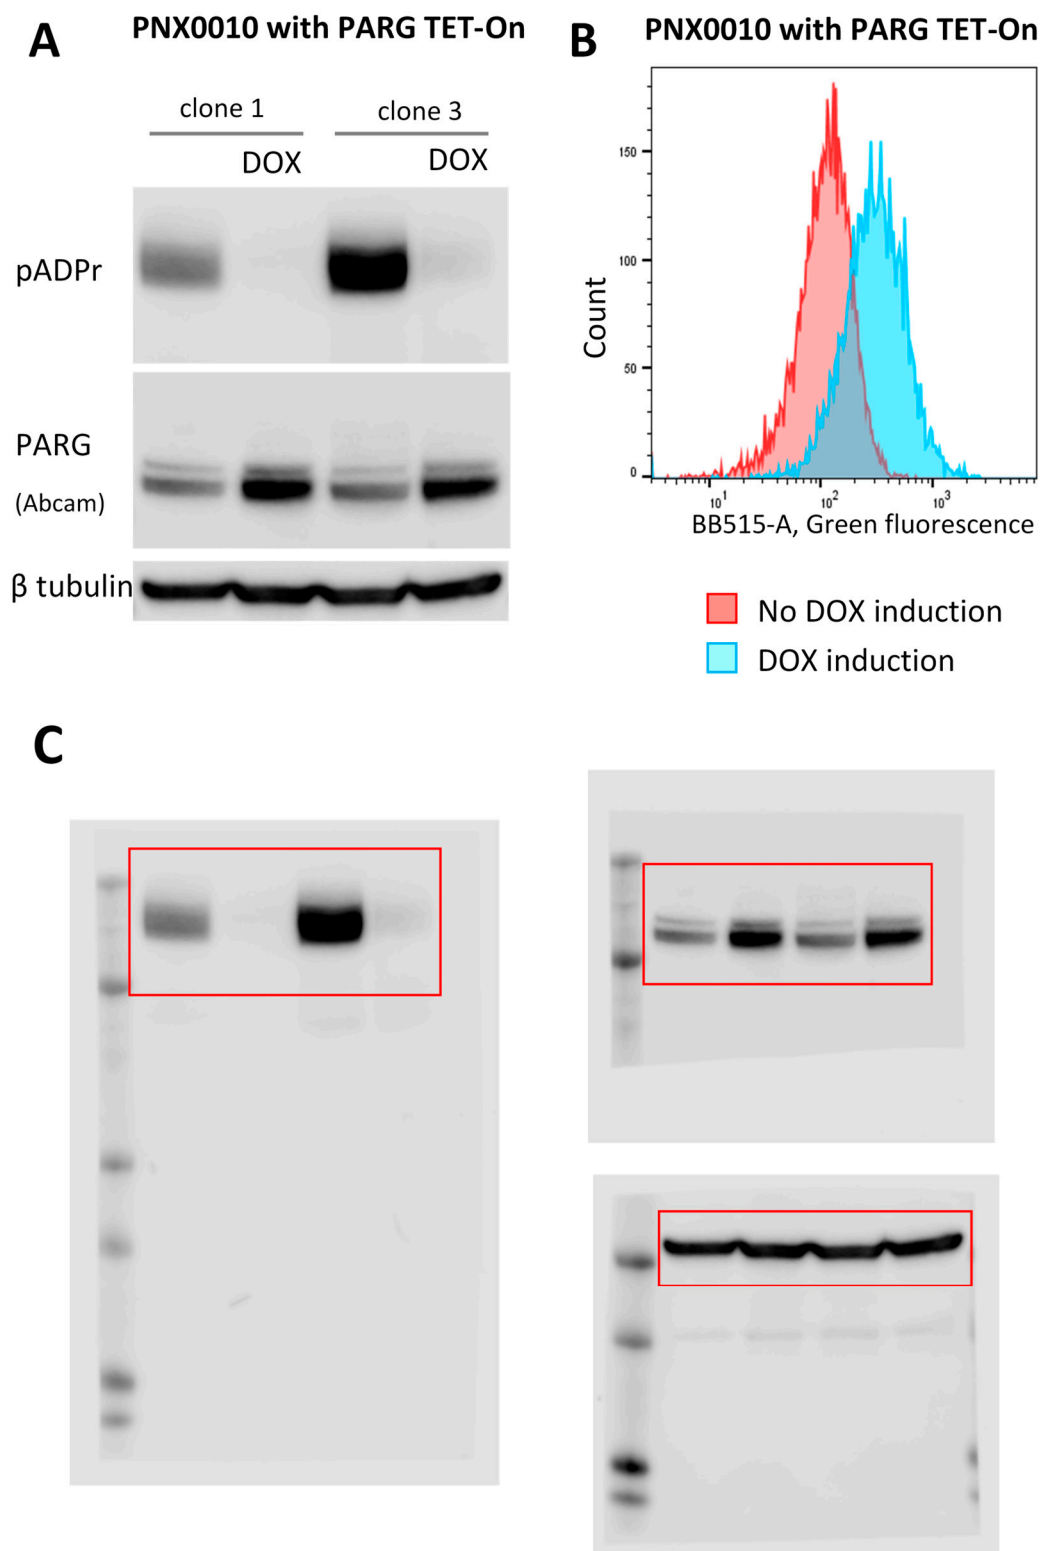

**Figure S6.** PARG overexpression and pADPr reduction in transduced PNX0010 cells. **(A)** pADPr inhibition in PNX0010 cell lines overexpressing PARG under 500 ng/ul doxycycline stimulation for 72 h. Two clones #1 and #3 are shown. Tubulin level is shown as a loading control. **(B)** Flow cytometry of live PNX0010 cell line with PARG TET-On lentovirus construct without doxycycline induction (red) and with doxycycline induction (blue). Because cDNA PARG is followed by cleavable mClover3 tag, cell numbers with increased green fluorescence is noticeable on histogram under doxycycline treatment. **(C)** Uncropped versions of Western Blots from (A).

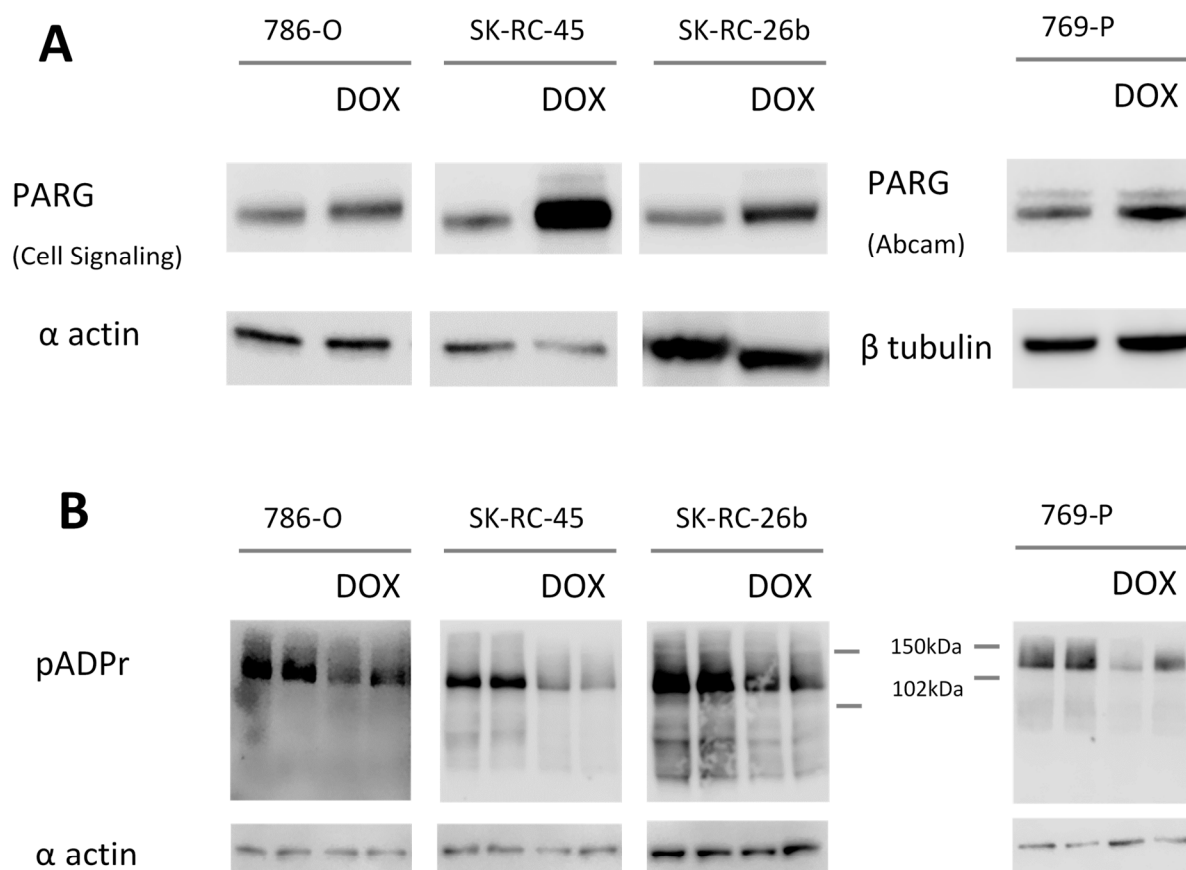

**Figure S7.** PARG overexpression and pADPr reduction in transduced ccRCC cells. (A) PARG overexpression and (B) pADPr reduction in 786-O, 769-P, SK-RC-45, SK-RC-26b transduced with Lenti-X construct under 500 ng/ul doxycycline stimulation for 72 h. Western blotting was probed for PARG using antibody (Abcam or Cell Signaling as indicated on figure) and for pADPr using MABE1031 reagent (Millipore).  $\beta$  tubulin and  $\alpha$  actin levels are shown as a loading control.

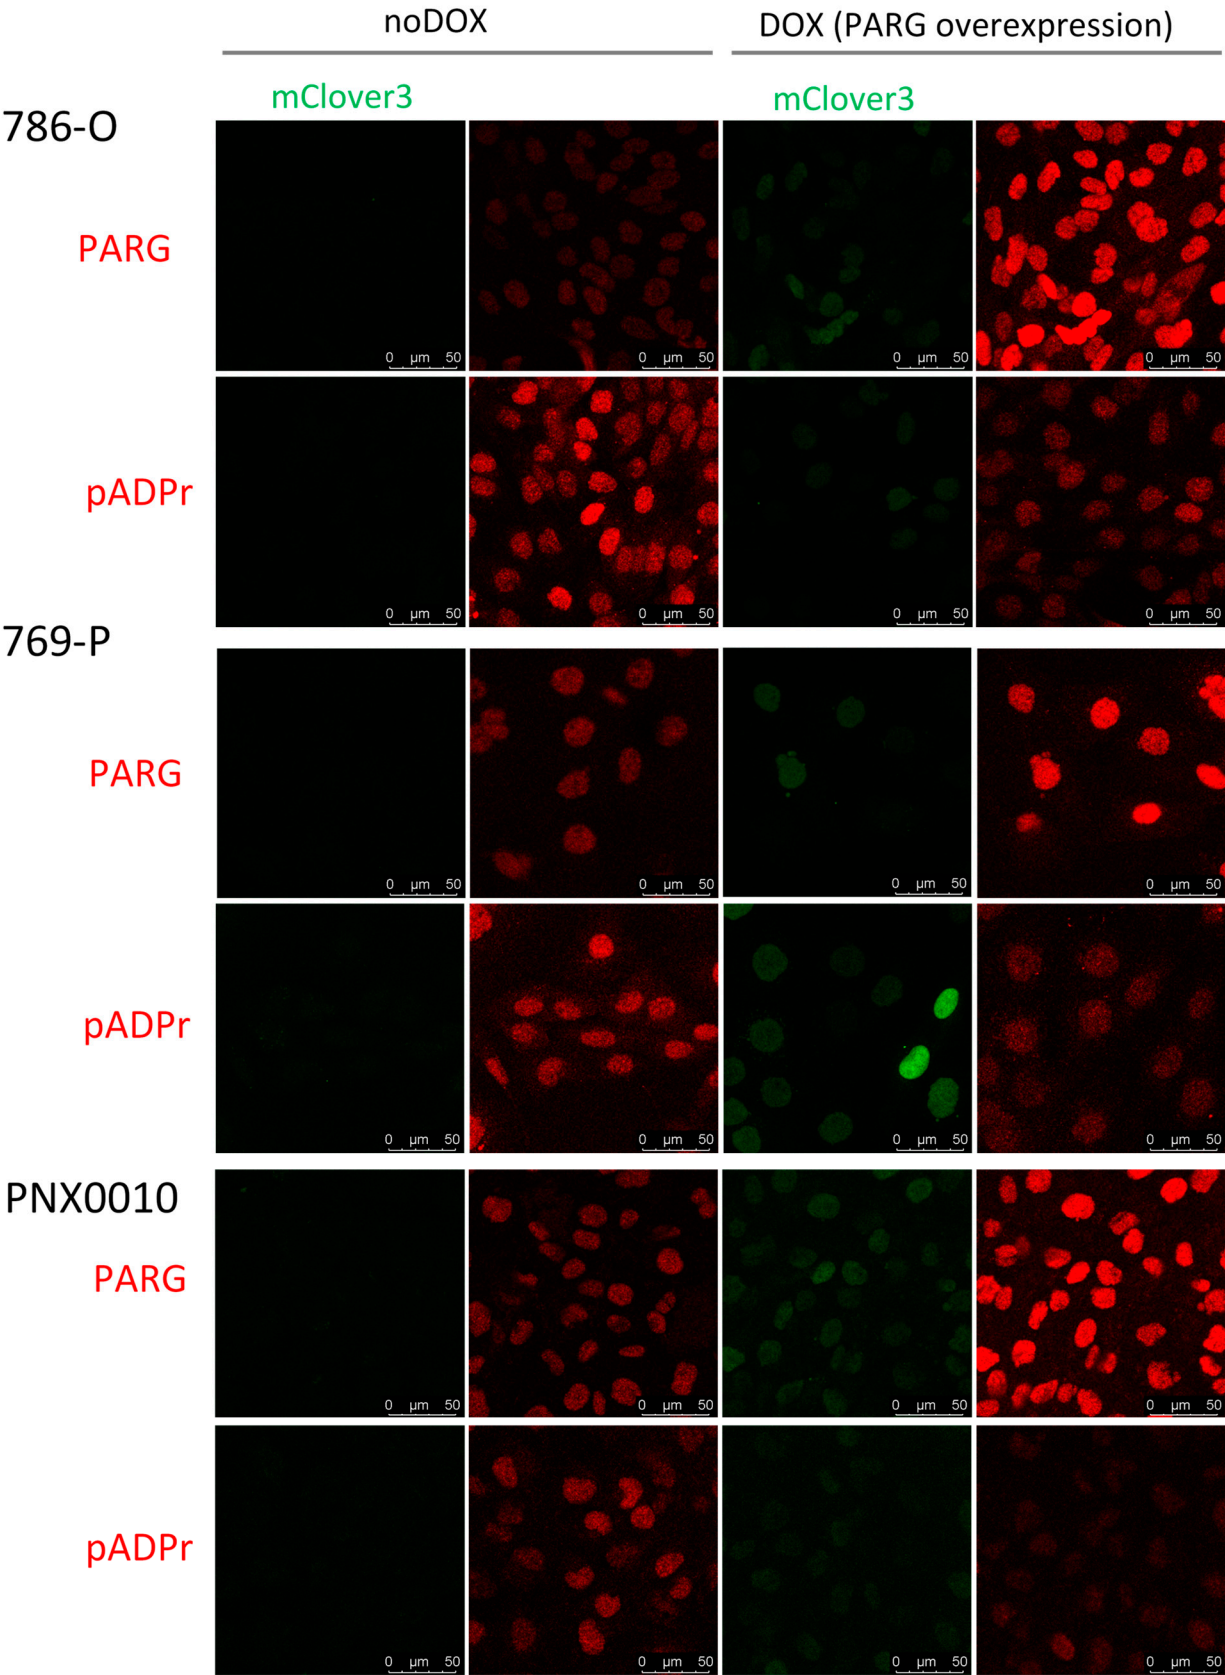

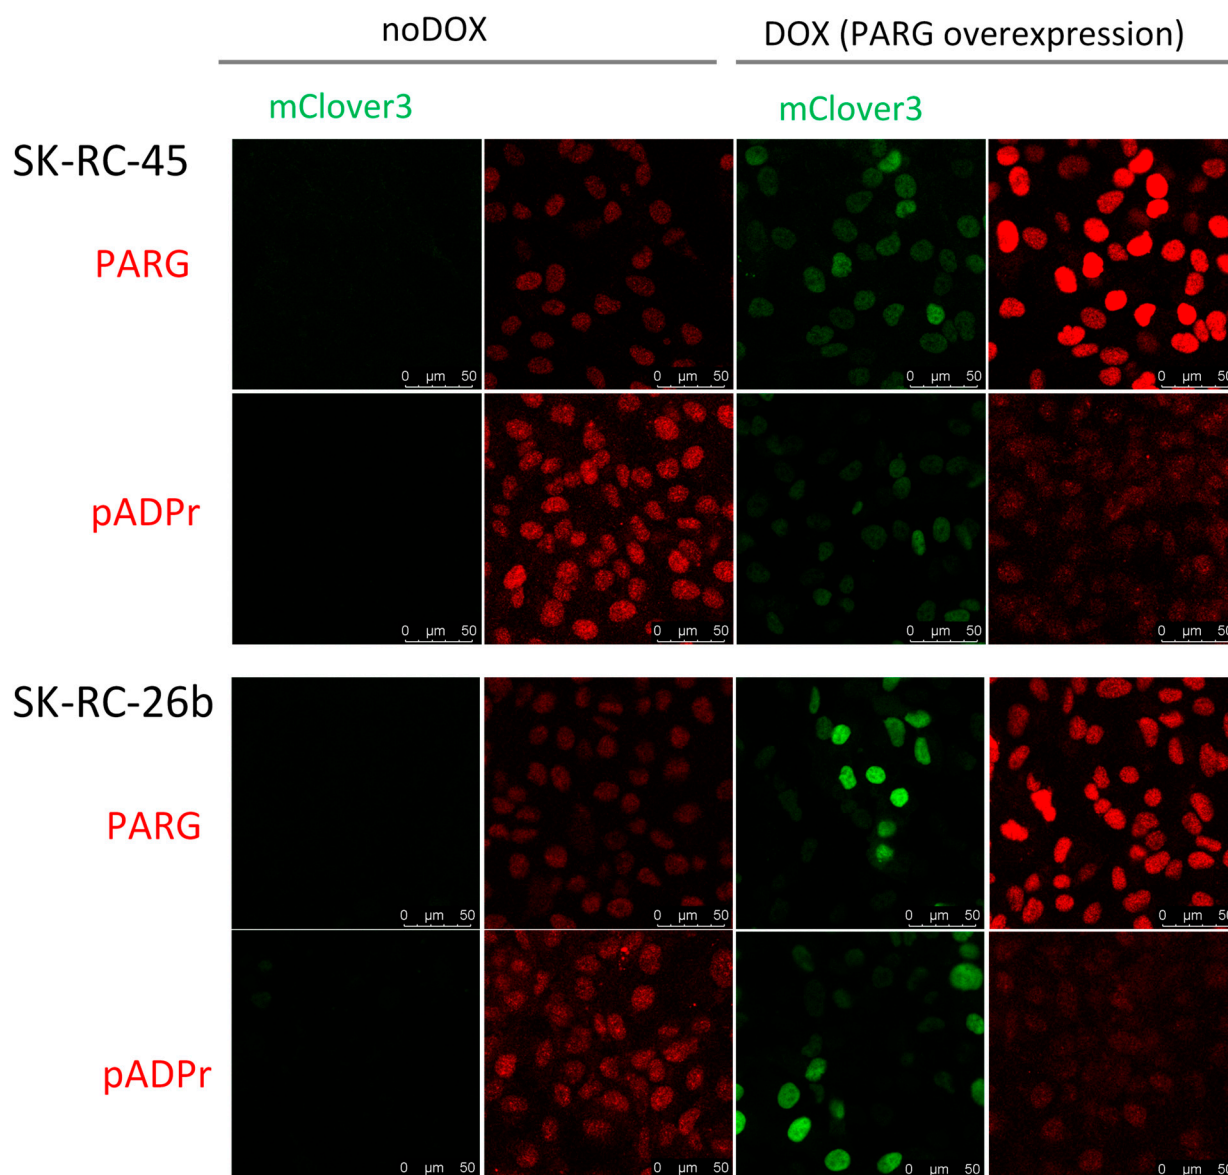

**Figure S8.** PARG overexpression and pADPr reduction in 786-O, 769-P, SK-RC-45, SK-RC-26b and PNx0010 transduced with PARG Tet-On Lenti-X construct under 500 ng/ul doxycycline stimulation for 72 h. Cells were fixed and stained for PARG using antibody (Cell Signaling) or for pADPr using MABE1031 reagent (Millipore) and corresponding Alexa 568 tagged secondary antibody. Green signal is from endogenous mClover3 cleavable fluorescence tag.

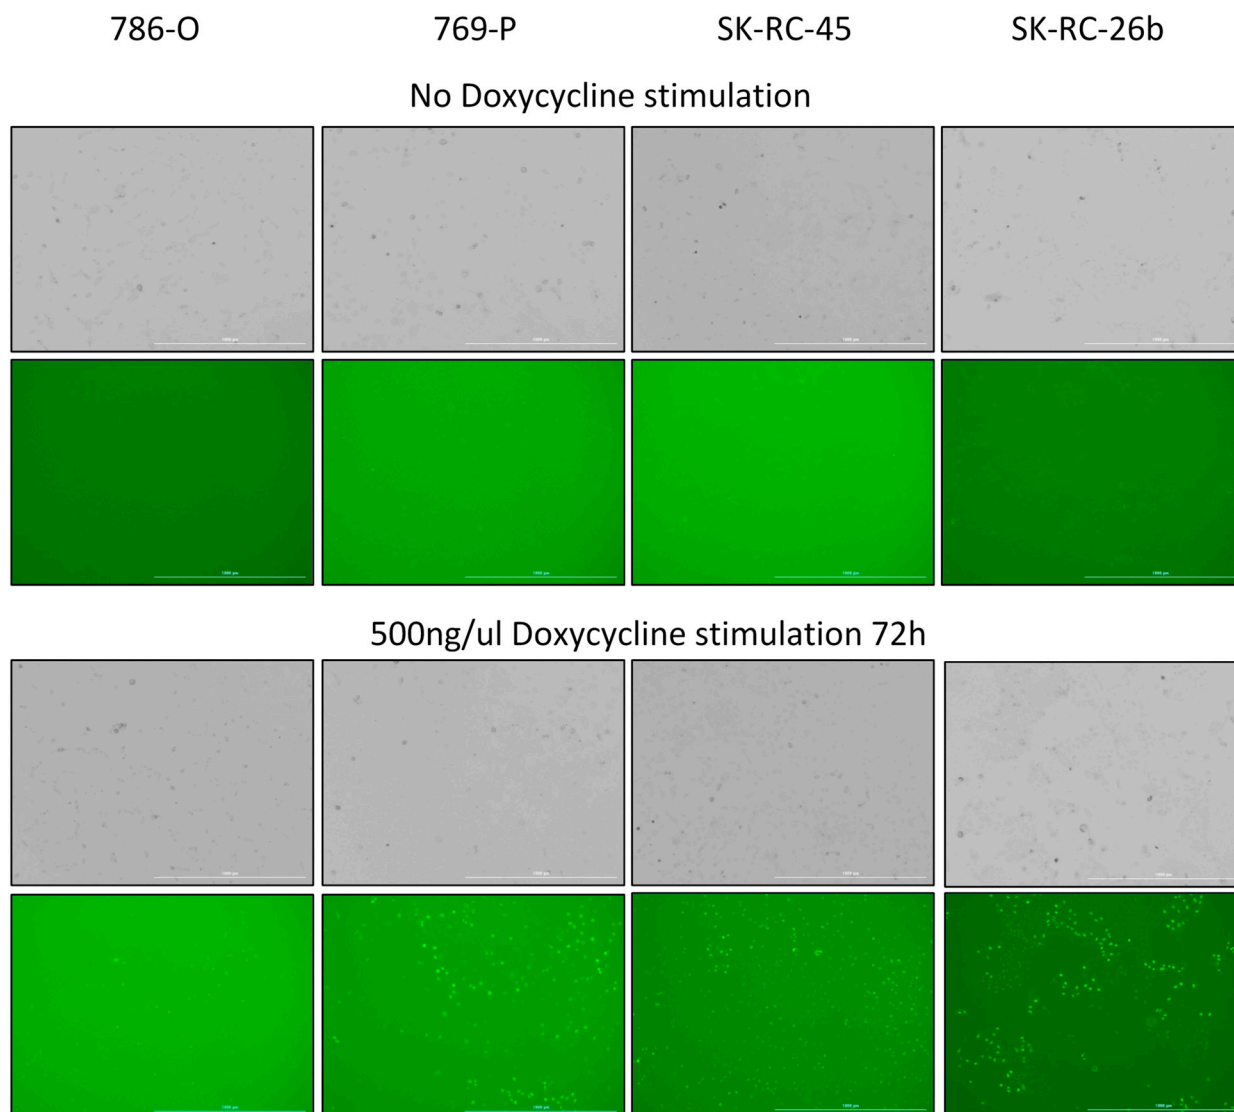

**Figure S9.** ccRCC cell lines were permanently transduced with lentivirus construct containing PARG cDNA followed by cleavable mCLOver3 green fluorescence protein with NLS signal under TET-On doxycycline inducible promoter. Live imaging is present with green fluorescence visible after doxycycline induction of lentivirus containing ccRCC cells. White scale 1000  $\mu$ m.



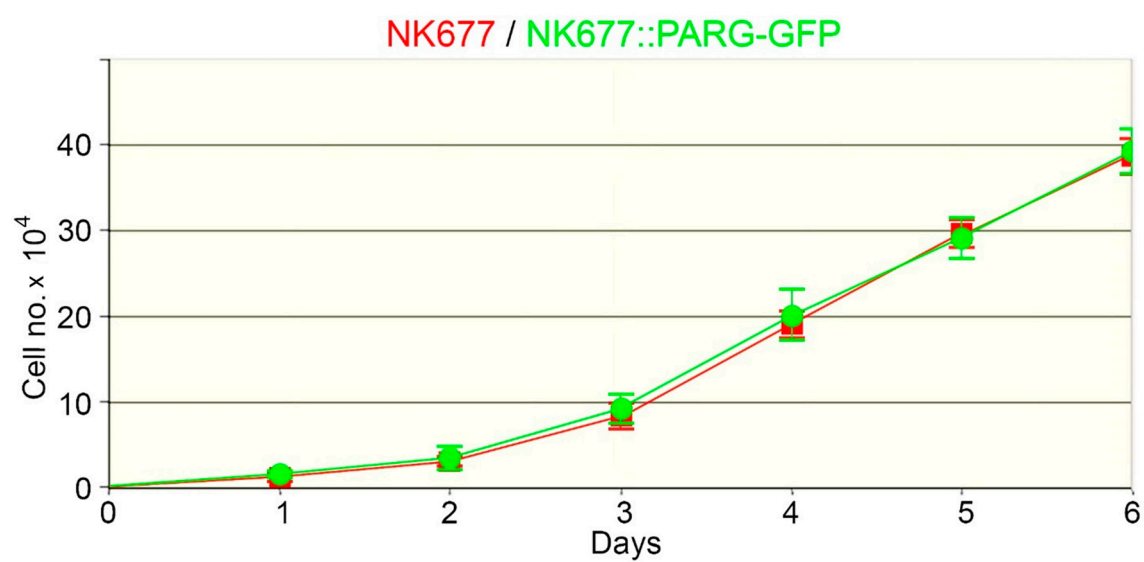

**Figure S10.** PARG protein overexpression does not affect the viability and the proliferation rate of normal kidney cells NK677.

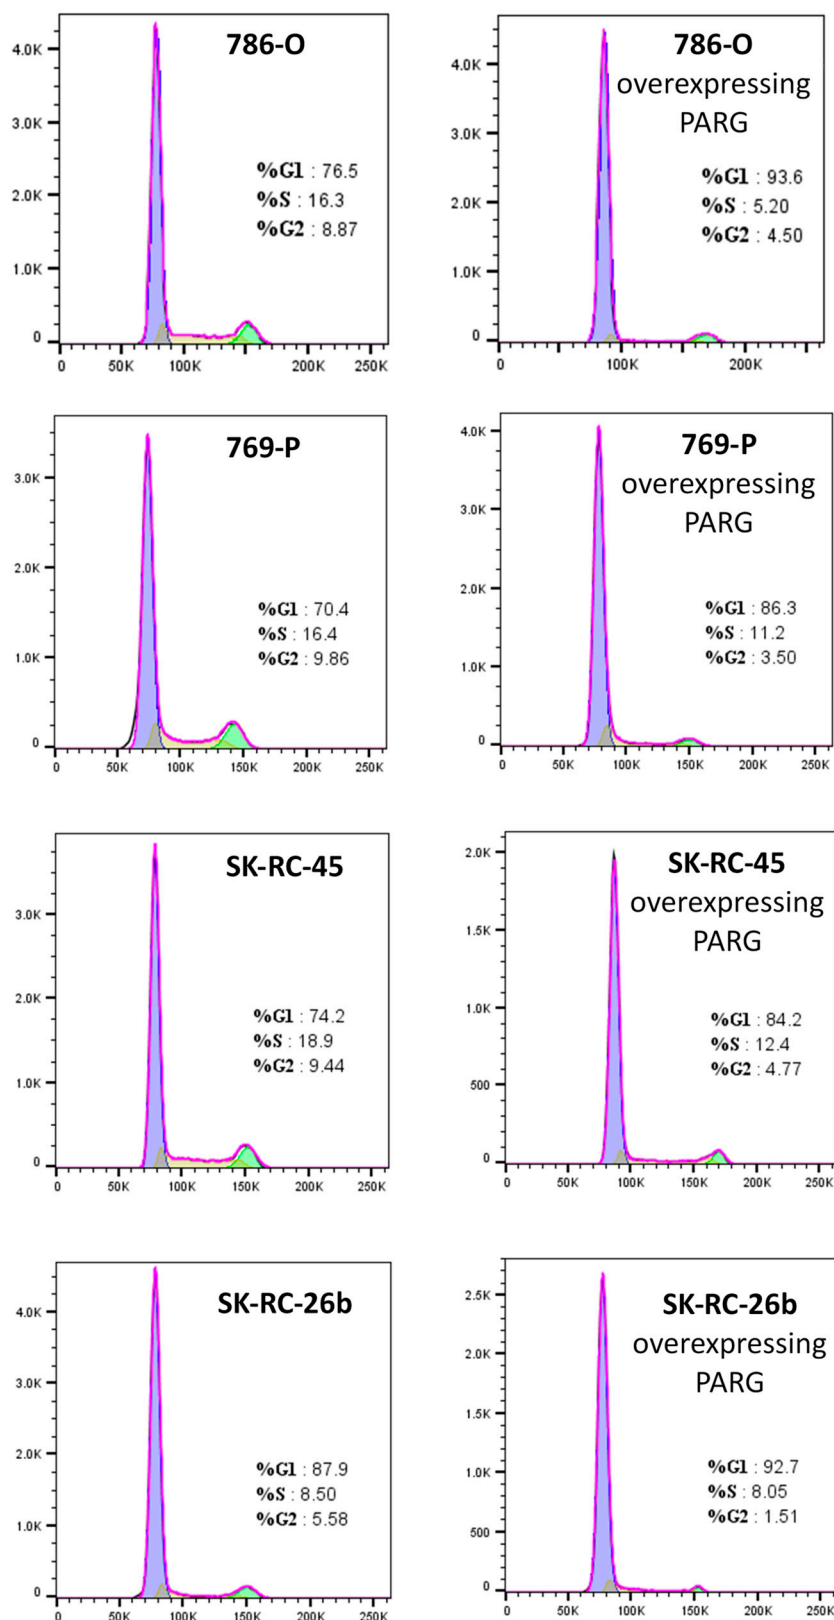

**Figure S11.** Histogram of cell cycle analysis ccRCC cells transduced with PARG Tet-On Lenti-X construct under 500 ng/ul doxycycline stimulation for 72 h.



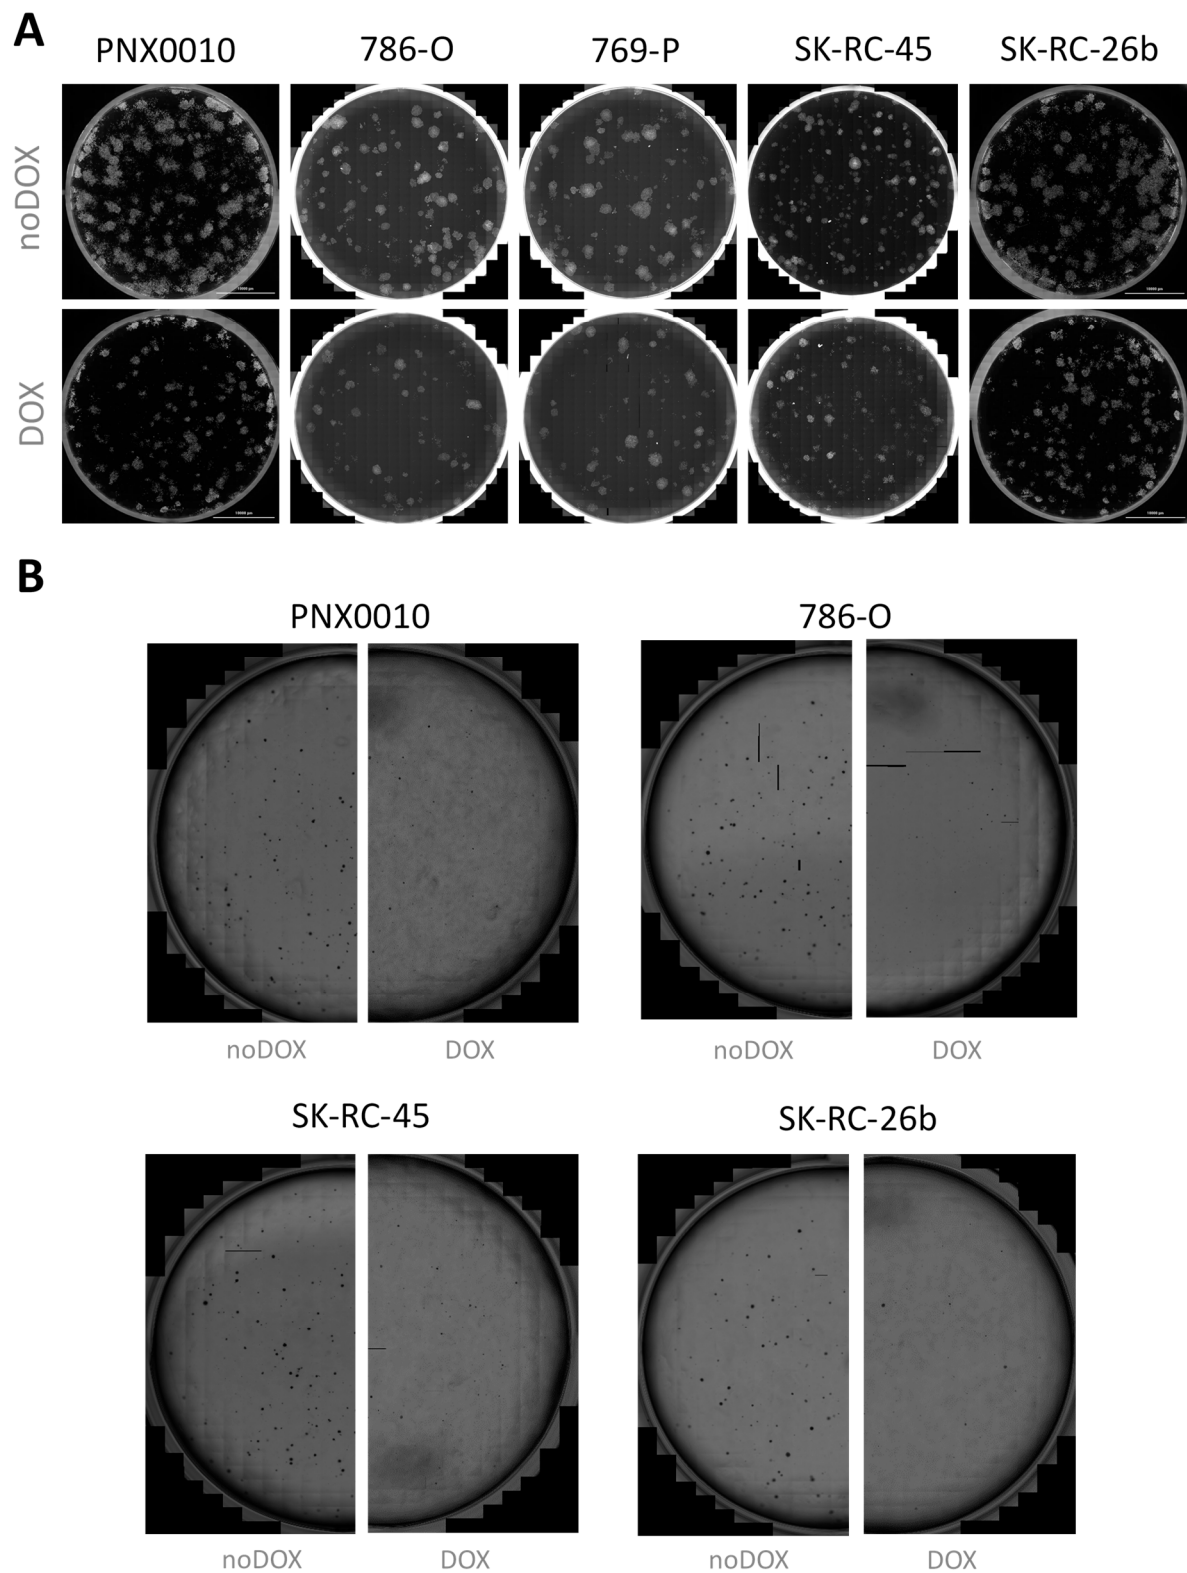

**Figure S12.** Images of ccRCC cells colonies transduced with PARG Tet-On Lenti-X construct with/without 500 ng/ul doxycycline stimulation for 72 h. Clonogenic (**A**) and colony-formation (**B**) assays are presented.

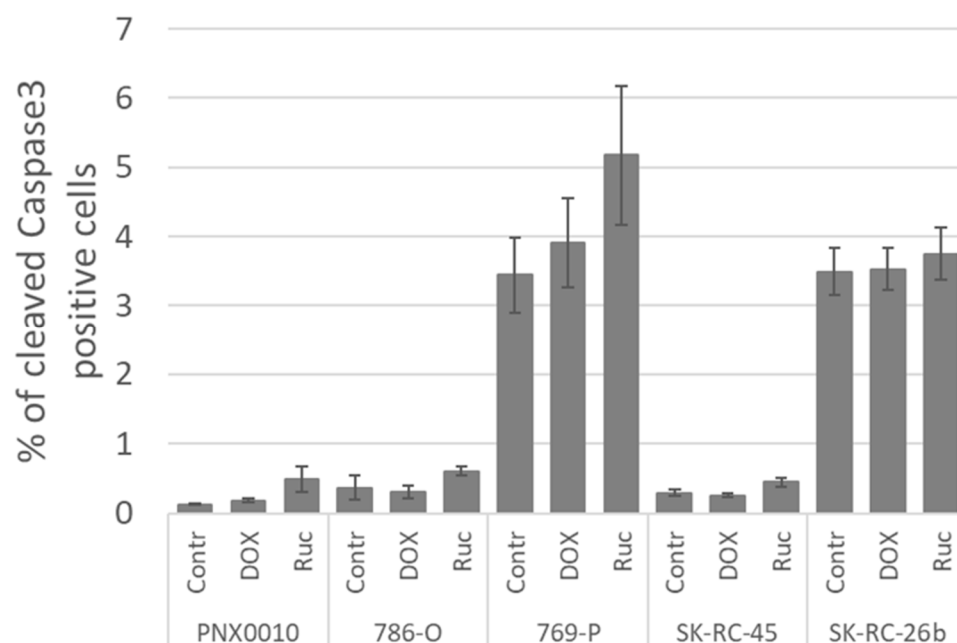

**Figure S13.** Apoptosis is not the cause of PARPs chemical inhibition and PARG overexpression related phenotypes in ccRCC cells. ccRCC cells transduced with PARG Tet-On Lenti-X construct were plated in 6 well dish in triplicates for each treatment groups: control with DMSO only, PARG overexpression with 500 ng/mL doxycycline for 72 hours and PARPs inhibition for 7.5 uM rucaparib for 48 hours. Cells were fixed and stained with antibodies to the marker of apoptotic cells cleaved Caspase3 and subjected to flow cytometry. % of cleaved Caspase3 positive cells were calculated in FlowJo software and plotted. We didn't detect significant increase of apoptotic cells between all treatment groups for all studied cell lines.

#### PNX0010 cells overexpressing PARG transcriptome analysis

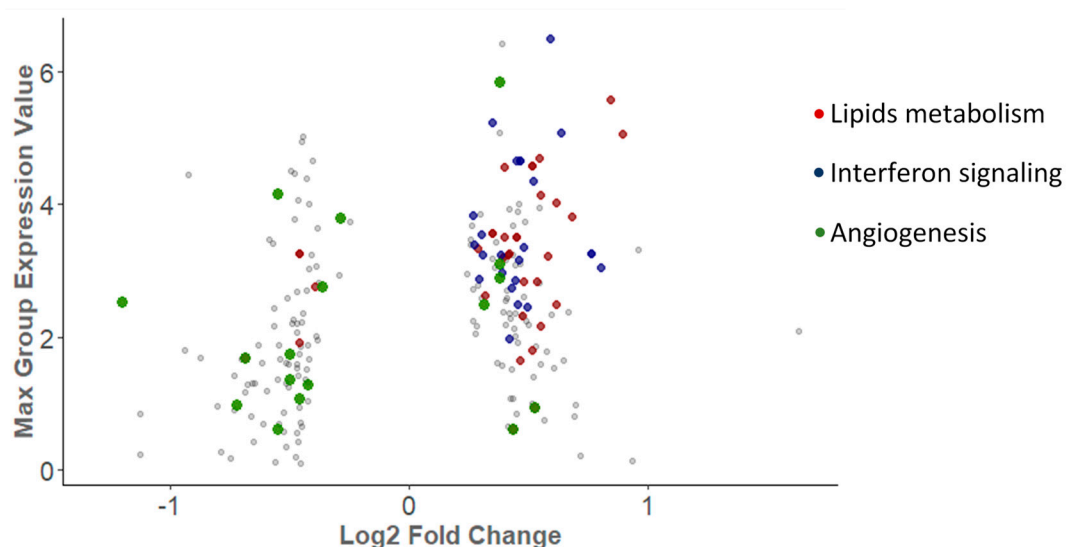

**Figure S14.** Maximum group expression value/Log2 fold change values for PNX0010 cells overexpressing PARG genes that differ with FDR corrected  $p$  value  $< 0.05$  and maximum group expression value  $> 1$ . Genes involved in Lipids metabolism (red) and Interferon signaling (blue) pathways are mostly found among upregulated genes and genes involved in Angiogenesis regulation (green) pathway are mostly found among downregulated genes colored red, blue and green respectively. Downregulated genes are enriched in angiogenesis regulation pathway, upregulated genes are enriched in cholesterol/lipids metabolism and interferon response.

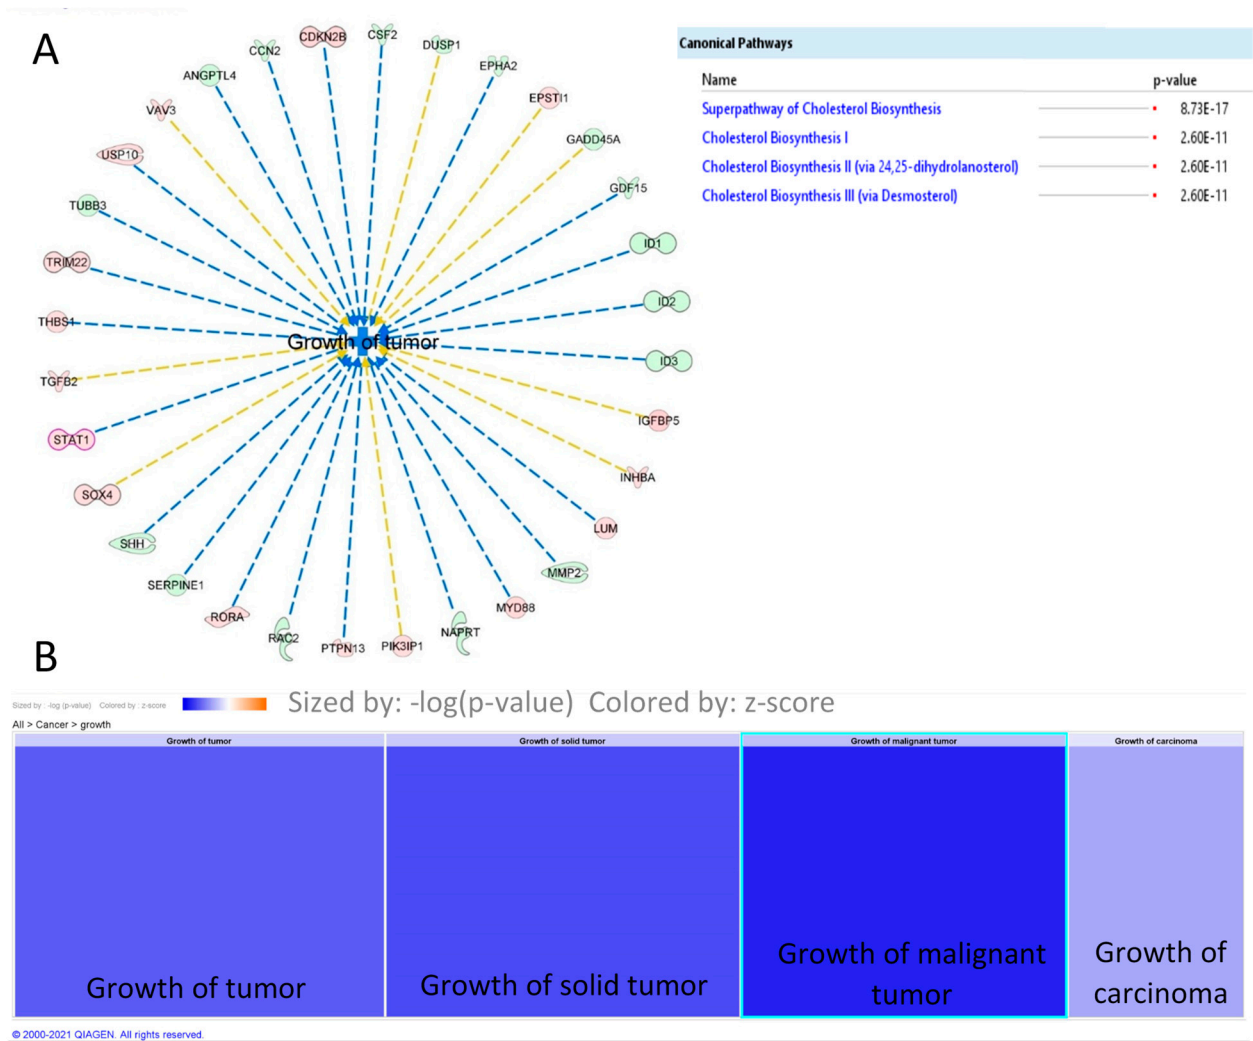

**Figure S15.** (A) Differently expressed genes in PNx0010 cells overexpressing PARG with FDR corrected  $p$  value  $< 0.05$  and maximum group expression value  $> 1$  involved in Growth of tumor disease phenotype predicted with Ingenuity Pathway Analysis software. (B) The overall phenotype is predicted to be downregulated.

Acety-CoA

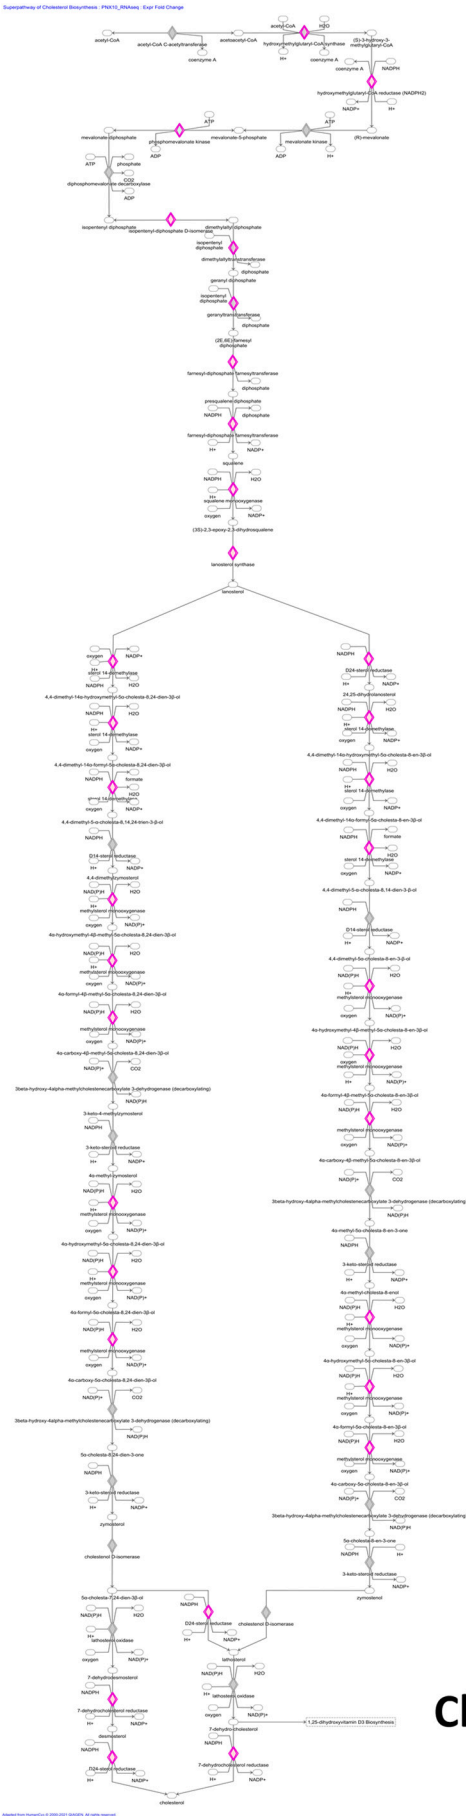

Cholesterol

**Figure S16.** Ingenuity Pathway Analysis software generated pathway of cholesterol biosynthesis with enzymes presented as diamonds and differently expressed in PNX0010 cells overexpressing PARG (FDR corrected  $p$  value < 0.05 and maximum expression value >1) colored as purple diamonds.

Downregulated genes with FDR <0.05, max group expression value >1.

|                                                                            | Homo sapiens (REF)   | upload_1 (▼ Hierarchy NEWI ②) |          |                 |     |             |          |
|----------------------------------------------------------------------------|----------------------|-------------------------------|----------|-----------------|-----|-------------|----------|
| GO biological process complete                                             | #                    | #                             | expected | Fold Enrichment | +/- | raw P value | FDR      |
| <a href="#">angiogenesis</a>                                               | <a href="#">318</a>  | <a href="#">11</a>            | 1.53     | 7.20            | +   | 5.04E-07    | 7.96E-03 |
| ↳ <a href="#">anatomical structure formation involved in morphogenesis</a> | <a href="#">883</a>  | <a href="#">16</a>            | 4.24     | 3.77            | +   | 5.41E-06    | 1.07E-02 |
| ↳ <a href="#">anatomical structure morphogenesis</a>                       | <a href="#">2158</a> | <a href="#">26</a>            | 10.37    | 2.51            | +   | 8.38E-06    | 1.32E-02 |
| ↳ <a href="#">blood vessel morphogenesis</a>                               | <a href="#">410</a>  | <a href="#">11</a>            | 1.97     | 5.58            | +   | 5.49E-06    | 9.64E-03 |
| ↳ <a href="#">tube morphogenesis</a>                                       | <a href="#">654</a>  | <a href="#">14</a>            | 3.14     | 4.45            | +   | 3.52E-06    | 1.11E-02 |
| ↳ <a href="#">tube development</a>                                         | <a href="#">856</a>  | <a href="#">16</a>            | 4.11     | 3.89            | +   | 3.67E-06    | 9.67E-03 |
| ↳ <a href="#">blood vessel development</a>                                 | <a href="#">492</a>  | <a href="#">13</a>            | 2.37     | 5.50            | +   | 8.53E-07    | 6.74E-03 |
| ↳ <a href="#">vasculature development</a>                                  | <a href="#">514</a>  | <a href="#">13</a>            | 2.47     | 5.26            | +   | 1.37E-06    | 7.22E-03 |
| ↳ <a href="#">circulatory system development</a>                           | <a href="#">877</a>  | <a href="#">16</a>            | 4.22     | 3.80            | +   | 4.97E-06    | 1.12E-02 |
| <a href="#">regulation of angiogenesis</a>                                 | <a href="#">282</a>  | <a href="#">9</a>             | 1.36     | 6.64            | +   | 1.09E-05    | 1.56E-02 |
| ↳ <a href="#">regulation of anatomical structure morphogenesis</a>         | <a href="#">967</a>  | <a href="#">16</a>            | 4.65     | 3.44            | +   | 1.65E-05    | 2.00E-02 |
| ↳ <a href="#">regulation of developmental process</a>                      | <a href="#">2461</a> | <a href="#">28</a>            | 11.83    | 2.37            | +   | 1.29E-05    | 1.70E-02 |
| ↳ <a href="#">regulation of vasculature development</a>                    | <a href="#">286</a>  | <a href="#">10</a>            | 1.37     | 7.27            | +   | 1.56E-06    | 6.17E-03 |
| ↳ <a href="#">regulation of multicellular organismal development</a>       | <a href="#">1332</a> | <a href="#">19</a>            | 6.40     | 2.97            | +   | 1.90E-05    | 2.15E-02 |
| <a href="#">embryo development</a>                                         | <a href="#">991</a>  | <a href="#">16</a>            | 4.76     | 3.36            | +   | 2.21E-05    | 2.33E-02 |

Upregulated genes with FDR <0.05, max group expression value >1.

|                                                                                  | Homo sapiens (REF)   | upload_1 (▼ Hierarchy NEWI ②) |          |                 |     |             |          |
|----------------------------------------------------------------------------------|----------------------|-------------------------------|----------|-----------------|-----|-------------|----------|
| Reactome pathways                                                                | #                    | #                             | expected | Fold Enrichment | +/- | raw P value | FDR      |
| <a href="#">Cholesterol biosynthesis via lathosterol</a>                         | <a href="#">4</a>    | <a href="#">2</a>             | .02      | 85.10           | +   | 5.00E-04    | 4.76E-02 |
| ↳ <a href="#">Cholesterol biosynthesis</a>                                       | <a href="#">24</a>   | <a href="#">10</a>            | .14      | 70.92           | +   | 3.69E-15    | 4.21E-12 |
| ↳ <a href="#">Metabolism of steroids</a>                                         | <a href="#">148</a>  | <a href="#">15</a>            | .87      | 17.25           | +   | 3.75E-14    | 2.14E-11 |
| ↳ <a href="#">Metabolism of lipids</a>                                           | <a href="#">733</a>  | <a href="#">26</a>            | 4.31     | 6.04            | +   | 2.18E-13    | 9.94E-11 |
| <a href="#">Cholesterol biosynthesis via desmosterol</a>                         | <a href="#">4</a>    | <a href="#">2</a>             | .02      | 85.10           | +   | 5.00E-04    | 4.57E-02 |
| <a href="#">OAS antiviral response</a>                                           | <a href="#">9</a>    | <a href="#">4</a>             | .05      | 75.65           | +   | 7.60E-07    | 1.45E-04 |
| ↳ <a href="#">Antiviral mechanism by IFN-stimulated genes</a>                    | <a href="#">79</a>   | <a href="#">9</a>             | .46      | 19.39           | +   | 2.27E-09    | 5.76E-07 |
| ↳ <a href="#">Interferon Signaling</a>                                           | <a href="#">196</a>  | <a href="#">15</a>            | 1.15     | 13.03           | +   | 1.67E-12    | 4.76E-10 |
| ↳ <a href="#">Cytokine Signaling in Immune system</a>                            | <a href="#">823</a>  | <a href="#">21</a>            | 4.84     | 4.34            | +   | 1.82E-08    | 4.15E-06 |
| <a href="#">Linoleic acid (LA) metabolism</a>                                    | <a href="#">8</a>    | <a href="#">3</a>             | .05      | 63.83           | +   | 3.10E-05    | 4.16E-03 |
| ↳ <a href="#">alpha-linolenic (omega3) and linoleic (omega6) acid metabolism</a> | <a href="#">12</a>   | <a href="#">3</a>             | .07      | 42.55           | +   | 8.40E-05    | 8.72E-03 |
| ↳ <a href="#">Fatty acid metabolism</a>                                          | <a href="#">174</a>  | <a href="#">8</a>             | 1.02     | 7.83            | +   | 1.18E-05    | 1.79E-03 |
| <a href="#">Activation of gene expression by SREBF (SREBP)</a>                   | <a href="#">40</a>   | <a href="#">11</a>            | .24      | 46.81           | +   | 6.64E-15    | 5.05E-12 |
| ↳ <a href="#">Regulation of cholesterol biosynthesis by SREBP (SREBF)</a>        | <a href="#">53</a>   | <a href="#">12</a>            | .31      | 38.54           | +   | 2.80E-15    | 6.40E-12 |
| <a href="#">alpha-linolenic acid (ALA) metabolism</a>                            | <a href="#">12</a>   | <a href="#">3</a>             | .07      | 42.55           | +   | 8.40E-05    | 9.14E-03 |
| <a href="#">Interferon alpha/beta signaling</a>                                  | <a href="#">67</a>   | <a href="#">11</a>            | .39      | 27.94           | +   | 9.50E-13    | 3.62E-10 |
| <a href="#">Fatty acyl-CoA biosynthesis</a>                                      | <a href="#">37</a>   | <a href="#">5</a>             | .22      | 23.00           | +   | 4.48E-06    | 7.30E-04 |
| <a href="#">Interferon gamma signaling</a>                                       | <a href="#">91</a>   | <a href="#">7</a>             | .53      | 13.09           | +   | 1.74E-06    | 3.05E-04 |
| <a href="#">ISG15 antiviral mechanism</a>                                        | <a href="#">71</a>   | <a href="#">5</a>             | .42      | 11.99           | +   | 8.30E-05    | 9.48E-03 |
| <a href="#">PPARA activates gene expression</a>                                  | <a href="#">114</a>  | <a href="#">6</a>             | .67      | 8.96            | +   | 7.44E-05    | 9.44E-03 |
| ↳ <a href="#">Regulation of lipid metabolism by PPARalpha</a>                    | <a href="#">115</a>  | <a href="#">6</a>             | .68      | 8.88            | +   | 7.79E-05    | 9.37E-03 |
| <a href="#">Metabolism of vitamins and cofactors</a>                             | <a href="#">186</a>  | <a href="#">7</a>             | 1.09     | 6.41            | +   | 1.41E-04    | 1.40E-02 |
| Unclassified                                                                     | <a href="#">9941</a> | <a href="#">30</a>            | 58.41    | .51             | -   | 1.96E-07    | 4.06E-05 |

**Figure S17.** Gene ontology Panther enrichment analysis (<http://geneontology.org/>) on differently expressed genes in PNX0010 cells overexpressing PARG with FDR corrected  $p$  value < 0.05 and maximum group expression value > 1. Down-regulated genes are enriched in angiogenesis regulation pathway, upregulated genes are enriched in cholesterol/lipids metabolism and interferon response.



**Table S1.** List of differently expressed genes in PNX0010 under PARG overexpression with FDR corrected *p* value >0.05, maximum gene expression value > 1 and fold change greater than 1.5.

| Name       | Induced vs. Control—Max Group Means | Induced vs. Control—Fold Change | Induced vs. Control—Log fold Change | Induced vs. Control—FDR <i>p</i> -value | Induced vs. Control— <i>p</i> -value |
|------------|-------------------------------------|---------------------------------|-------------------------------------|-----------------------------------------|--------------------------------------|
| PTGDS      | 1.276835                            | −4.25774                        | −2.09009                            | 0.012252                                | $9.03 \times 10^{-05}$               |
| SMIM11B    | 3.09168                             | −3.35737                        | −1.74733                            | 0.000301                                | $7.71 \times 10^{-07}$               |
| AC073896.1 | 1.960024                            | −2.54514                        | −1.34775                            | 0.01966                                 | 0.000173                             |
| ID1        | 12.5851                             | −2.29807                        | −1.20043                            | 0                                       | 0                                    |
| PARD6A     | 2.311063                            | −2.18061                        | −1.12473                            | 0.016127                                | 0.000128                             |
| COL1A1     | 1.251966                            | −2.18007                        | −1.12437                            | $7.04 \times 10^{-05}$                  | $1.48 \times 10^{-07}$               |
| NRGN       | 6.116371                            | −1.91867                        | −0.9401                             | 0.007711                                | $4.96 \times 10^{-05}$               |
| ID3        | 85.77683                            | −1.89658                        | −0.9234                             | 0                                       | 0                                    |
| ATOH8      | 5.430042                            | −1.83184                        | −0.87329                            | $1.85 \times 10^{-09}$                  | $8.61 \times 10^{-13}$               |
| F12        | 2.604499                            | −1.74229                        | −0.80099                            | 0.012049                                | $8.65 \times 10^{-05}$               |
| PRX        | 1.314763                            | −1.72537                        | −0.78691                            | 0.00015                                 | $3.7 \times 10^{-07}$                |
| GNAZ       | 1.180026                            | −1.67861                        | −0.74727                            | 0.049763                                | 0.000573                             |
| ADGRB2     | 2.462669                            | −1.66168                        | −0.73264                            | $6.45 \times 10^{-07}$                  | $5.11 \times 10^{-10}$               |
| SLC44A2    | 4.170332                            | −1.66103                        | −0.73208                            | $4.64 \times 10^{-07}$                  | $3.03 \times 10^{-10}$               |
| PGF        | 2.651785                            | −1.64697                        | −0.71981                            | 0.016339                                | 0.000131                             |
| NAPRT      | 5.32412                             | −1.62619                        | −0.7015                             | $9.92 \times 10^{-06}$                  | $1.39 \times 10^{-08}$               |
| PRR3       | 3.201183                            | −1.60898                        | −0.68614                            | 0.002764                                | $1.31 \times 10^{-05}$               |
| ANGPTL4    | 5.383392                            | −1.60737                        | −0.6847                             | $1.03 \times 10^{-05}$                  | $1.53 \times 10^{-08}$               |
| SMAD6      | 3.640612                            | −1.59787                        | −0.67615                            | $6.2 \times 10^{-06}$                   | $8.08 \times 10^{-09}$               |
| ETV4       | 2.235186                            | −1.57998                        | −0.65991                            | 0.00044                                 | $1.21 \times 10^{-06}$               |
| CDKN1C     | 3.685981                            | −1.57291                        | −0.65344                            | 0.001554                                | $6.01 \times 10^{-06}$               |
| CDADC1     | 1.538472                            | −1.56888                        | −0.64973                            | 0.037596                                | 0.000394                             |
| IGF2_1     | 3.661241                            | −1.56377                        | −0.64503                            | $5.08 \times 10^{-06}$                  | $5.91 \times 10^{-09}$               |
| KIFC2      | 6.600726                            | −1.54711                        | −0.62958                            | $1.04 \times 10^{-05}$                  | $1.6 \times 10^{-08}$                |
| STMN3      | 5.002031                            | −1.53321                        | −0.61656                            | $7.38 \times 10^{-05}$                  | $1.58 \times 10^{-07}$               |
| APLP1      | 2.013179                            | −1.5242                         | −0.60806                            | 0.012102                                | $8.74 \times 10^{-05}$               |
| ARHGAP19   | 3.297472                            | −1.51002                        | −0.59457                            | $9.08 \times 10^{-05}$                  | $2.03 \times 10^{-07}$               |
| LFNG       | 32.12265                            | −1.50183                        | −0.58672                            | 0                                       | 0                                    |
| IFI6       | 653.55                              | 1.506149                        | 0.590864                            | $3.59 \times 10^{-06}$                  | $3.85 \times 10^{-09}$               |
| MYD88      | 10.41602                            | 1.50862                         | 0.593229                            | $3.01 \times 10^{-05}$                  | $5.06 \times 10^{-08}$               |
| AC138894.1 | 4.624422                            | 1.524475                        | 0.608312                            | $4.77 \times 10^{-05}$                  | $9.11 \times 10^{-08}$               |
| HMGCS1     | 12.02115                            | 1.531706                        | 0.615139                            | $5.37 \times 10^{-06}$                  | $6.51 \times 10^{-09}$               |
| FASN       | 56.1791                             | 1.534721                        | 0.617977                            | $8.93 \times 10^{-07}$                  | $7.49 \times 10^{-10}$               |
| IFITM1     | 159.4943                            | 1.556607                        | 0.638405                            | 0.000467                                | $1.31 \times 10^{-06}$               |
| TNFSF13B   | 5.193219                            | 1.564315                        | 0.645531                            | $3.13 \times 10^{-05}$                  | $5.69 \times 10^{-08}$               |
| CDKN2B     | 10.77522                            | 1.585976                        | 0.665371                            | $5.2 \times 10^{-07}$                   | $3.88 \times 10^{-10}$               |
| DHCR7      | 44.88584                            | 1.603855                        | 0.681544                            | $3.55 \times 10^{-08}$                  | $1.82 \times 10^{-11}$               |
| AL358113.1 | 2.246074                            | 1.615253                        | 0.69176                             | 0.001805                                | $7.82 \times 10^{-06}$               |
| SLCO4C1    | 2.684362                            | 1.618501                        | 0.694659                            | $4.35 \times 10^{-06}$                  | $4.86 \times 10^{-09}$               |
| PRUNE2     | 1.228858                            | 1.643906                        | 0.717128                            | 0.000132                                | $3.14 \times 10^{-07}$               |
| OAS2       | 26.09501                            | 1.699046                        | 0.764725                            | $1.29 \times 10^{-10}$                  | $5.4 \times 10^{-14}$                |
| MX2        | 21.20449                            | 1.746987                        | 0.804869                            | $2 \times 10^{-11}$                     | $7.44 \times 10^{-15}$               |
| SCD        | 261.0701                            | 1.794982                        | 0.843969                            | 0                                       | 0                                    |
| INSIG1     | 157.7861                            | 1.85465                         | 0.891147                            | 0                                       | 0                                    |
| IGFBP5     | 1.149041                            | 1.911475                        | 0.934686                            | $6.06 \times 10^{-05}$                  | $1.24 \times 10^{-07}$               |
| PARG       | 27.53599                            | 1.945367                        | 0.960043                            | 0                                       | 0                                    |
| SLX1B      | 8.134409                            | 3.09175                         | 1.628424                            | 0.012029                                | $8.57 \times 10^{-05}$               |

**Table S2.** Biological processes functional enrichment in differently expressed genes in PNX0010 cells overexpressing PARG with FDR corrected  $p$  value  $< 0.05$  and maximum group expression value  $> 1$  predicted with STRING analysis for multiple proteins (<https://string-db.org/>). All GO terms were filtered as followed: gene count in term presented  $> 7$ , strength  $> 0.7$  and FDR  $< 0.001$ . Out of all GO terms three main groups were represented: regulation of lipid metabolism with focus in cholesterol biosynthesis (red), antiviral response with focus in interferon signaling (blue), and angiogenesis (green).

| term ID    | term description<br>observed gene count, >7     | background<br>gene count | strength,<br>>0.7 | FDR, <0.001 |                        |
|------------|-------------------------------------------------|--------------------------|-------------------|-------------|------------------------|
| GO:0006695 | cholesterol biosynthetic process                | 13                       | 41                | 1.47        | 4.90x10 <sup>-11</sup> |
| GO:0045540 | regulation of cholesterol biosynthetic process  | 13                       | 42                | 1.46        | 4.90x10 <sup>-11</sup> |
| GO:0090181 | regulation of cholesterol metabolic process     | 14                       | 54                | 1.38        | 4.90x10 <sup>-11</sup> |
| GO:0060337 | type I interferon signaling pathway             | 13                       | 65                | 1.27        | 6.5x10E-10             |
| GO:0050810 | regulation of steroid biosynthetic process      | 15                       | 84                | 1.22        | 8.10x10 <sup>-11</sup> |
| GO:0019218 | regulation of steroid metabolic process         | 17                       | 112               | 1.15        | 4.90x10 <sup>-11</sup> |
| GO:0045071 | negative regulation of viral genome replication | 8                        | 52                | 1.15        | 1.70x10 <sup>-05</sup> |
| GO:0008203 | cholesterol metabolic process                   | 15                       | 109               | 1.1         | 1.20x10 <sup>-09</sup> |
| GO:0016125 | sterol metabolic process                        | 16                       | 127               | 1.07        | 8.75x10 <sup>-10</sup> |
| GO:0045069 | regulation of viral genome replication          | 9                        | 85                | 0.99        | 4.60x10 <sup>-05</sup> |
| GO:0060333 | interferon-gamma-mediated signaling pathway     | 7                        | 69                | 0.97        | 0.00063                |
| GO:0051607 | defense response to virus                       | 18                       | 181               | 0.96        | 1.20x10 <sup>-09</sup> |
| GO:0046890 | regulation of lipid biosynthetic process        | 17                       | 174               | 0.96        | 4.50x10 <sup>-09</sup> |
| GO:0048525 | negative regulation of viral process            | 9                        | 93                | 0.95        | 7.95x10 <sup>-05</sup> |
| GO:0006637 | acyl-CoA metabolic process                      | 8                        | 88                | 0.92        | 0.00038                |
| GO:1901617 | organic hydroxy compound biosynthetic process   | 14                       | 161               | 0.9         | 7.28x10 <sup>-07</sup> |
| GO:0006633 | fatty acid biosynthetic process                 | 9                        | 104               | 0.9         | 0.00017                |
| GO:0009615 | response to virus                               | 20                       | 270               | 0.83        | 7.14x10 <sup>-09</sup> |
| GO:0006720 | isoprenoid metabolic process                    | 9                        | 123               | 0.83        | 0.0005                 |
| GO:0033875 | ribonucleoside biphosphate metabolic process    | 9                        | 123               | 0.83        | 0.0005                 |
| GO:0034032 | purine nucleoside biphosphate metabolic process | 9                        | 123               | 0.83        | 0.0005                 |
| GO:0019216 | regulation of lipid metabolic process           | 26                       | 373               | 0.81        | 8.10x10 <sup>-11</sup> |
| GO:0008202 | steroid metabolic process                       | 17                       | 248               | 0.8         | 5.21x10 <sup>-07</sup> |
| GO:0062012 | regulation of small molecule metabolic process  | 22                       | 332               | 0.79        | 5.83x10 <sup>-09</sup> |
| GO:0009108 | coenzyme biosynthetic process                   | 11                       | 167               | 0.78        | 0.00017                |
| GO:0006066 | alcohol metabolic process                       | 18                       | 290               | 0.76        | 7.28x10 <sup>-07</sup> |
| GO:0001525 | angiogenesis                                    | 17                       | 297               | 0.72        | 4.27x10 <sup>-06</sup> |
| GO:0050792 | regulation of viral process                     | 10                       | 174               | 0.72        | 0.00098                |
| GO:0009165 | nucleotide biosynthetic process                 | 16                       | 291               | 0.71        | 1.59x10 <sup>-05</sup> |
| GO:0072330 | monocarboxylic acid biosynthetic process        | 11                       | 200               | 0.71        | 0.00065                |



**Table S3.** List of primers used for qPCR experiments.

| Primer and gene name | Sequence                |
|----------------------|-------------------------|
| Id1_F1.              | GCTGTTACTCACGCCTCAA     |
| Id1_R1               | CAACTGAAGGTCCCTGATGTAG  |
| Id2_F1               | GACTCGCATCCCACTATTGTC   |
| Id2_R1               | ACTCAGAAGGGAATTCAGAAGC  |
| Id3_F1               | CGCGTCATCGACTACATTCT    |
| Id3_R1               | TCGTTGGAGATGACAAGTTCC   |
| CSF2_F               | CAGCCTCACCAAGCTCAA      |
| CSF2_R               | ATAATCTGGGTGTCACAGGAA   |
| Serpine_F1           | AGCAGCTATGGGATTCAAGATT  |
| Serpine_R1           | GGTGCTGATCTCATCCTTGT    |
| ANGPTL4_F            | GAGGTCCTTCACAGCCTGCA    |
| ANGPTL4_R            | TTGGAGACTTTCTTCCGGTCAT  |
| PARG_F1              | AGGAAACTCACTGTTGGAGATG  |
| PARG_R1              | GGACTCGACAGCATGGTATATG  |
| PARG_F2              | CCAAAGCAGAGGACAGAAGAA   |
| PARG_R2              | AAGGTGAGGTGGAACGTATTTAG |
| SCD1 F1              | TACCGCTGGCACATCAACTT    |
| SCD1 R1              | TTGGAGACTTTCTTCCGGTCAT  |
| INSIG1 F1            | CCTGCTGCGGGACAGC        |
| INSIG1 R1            | GTTCTCCGAGGTGACTGTCGA   |
| hPolr2a_F1           | CAACCAAGCCATTGCGCATC    |
| Polr2a_R1            | ACACCCAGCGTCACATTCTT    |
| B2M_F1               | CGCTACTCTCTCTTTCTGGC    |
| B2M_R1               | CTGGATGACGTGAGTAAACCTG  |

**Table S4.** List of differently expressed genes in PN0010 under PARG overexpression with FDR corrected *p* value >0.05 and maximum gene expression value >1.

| Name       | Induced vs. Control—Max Group Means | Induced vs. Control—Fold Change | Induced vs. Control—Log Fold Change | Induced vs. Control—FDR <i>p</i> -value | Induced vs. Control— <i>p</i> -value |
|------------|-------------------------------------|---------------------------------|-------------------------------------|-----------------------------------------|--------------------------------------|
| PTGDS      | 1.2768349                           | -4.2577356                      | -2.0900864                          | 0.012252473                             | $9.02992 \times 10^{-05}$            |
| SMIM11B    | 3.09168                             | -3.3573683                      | -1.7473308                          | 0.000300705                             | $7.70572 \times 10^{-07}$            |
| AC073896.1 | 1.9600237                           | -2.5451414                      | -1.3477458                          | 0.019659855                             | 0.000172545                          |
| ID1        | 12.585099                           | -2.2980748                      | -1.2004258                          | 0                                       | 0                                    |
| PARD6A     | 2.3110631                           | -2.1806119                      | -1.124733                           | 0.016127082                             | 0.000128488                          |
| COL1A1     | 1.2519664                           | -2.1800685                      | -1.1243735                          | $7.03771 \times 10^{-05}$               | $1.47555 \times 10^{-07}$            |
| NRGN       | 6.1163709                           | -1.9186661                      | -0.9401037                          | 0.007710954                             | $4.95789 \times 10^{-05}$            |
| ID3        | 85.77683                            | -1.8965792                      | -0.9233996                          | 0                                       | 0                                    |
| ATOH8      | 5.4300423                           | -1.8318395                      | -0.8732931                          | $1.84816 \times 10^{-09}$               | $8.61089 \times 10^{-13}$            |
| F12        | 2.6044993                           | -1.7422909                      | -0.8009855                          | 0.012049276                             | $8.64552 \times 10^{-05}$            |
| PRX        | 1.314763                            | -1.7253722                      | -0.7869076                          | 0.000149968                             | $3.70325 \times 10^{-07}$            |
| GNAZ       | 1.1800258                           | -1.6786129                      | -0.7472696                          | 0.049763291                             | 0.000572685                          |
| ADGRB2     | 2.4626688                           | -1.6616821                      | -0.7326444                          | $6.44846 \times 10^{-07}$               | $5.10757 \times 10^{-10}$            |
| SLC44A2    | 4.1703323                           | -1.6610319                      | -0.7320798                          | $4.6415 \times 10^{-07}$                | $3.02758 \times 10^{-10}$            |
| PGF        | 2.651785                            | -1.6469672                      | -0.7198119                          | 0.016339143                             | 0.000130938                          |
| NAPRT      | 5.3241201                           | -1.6261892                      | -0.7014951                          | $9.92118 \times 10^{-06}$               | $1.38674 \times 10^{-08}$            |
| PRR3       | 3.2011831                           | -1.6089757                      | -0.6861426                          | 0.002764208                             | $1.31009 \times 10^{-05}$            |
| ANGPTL4    | 5.3833923                           | -1.6073715                      | -0.6847034                          | $1.02725 \times 10^{-05}$               | $1.53157 \times 10^{-08}$            |
| SMAD6      | 3.6406119                           | -1.5978668                      | -0.6761472                          | $6.19596 \times 10^{-06}$               | $8.08307 \times 10^{-09}$            |
| ETV4       | 2.2351863                           | -1.5799805                      | -0.6599068                          | 0.000440015                             | $1.20957 \times 10^{-06}$            |
| CDKN1C     | 3.6859812                           | -1.5729105                      | -0.6534366                          | 0.001553545                             | $6.00774 \times 10^{-06}$            |
| CDADC1     | 1.5384721                           | -1.5688777                      | -0.6497329                          | 0.037595883                             | 0.000394124                          |

|            |           |            |            |                           |                           |
|------------|-----------|------------|------------|---------------------------|---------------------------|
| IGF2_1     | 3.6612411 | −1.5637709 | −0.6450292 | $5.07583 \times 10^{-06}$ | $5.9123 \times 10^{-09}$  |
| KIFC2      | 6.6007264 | −1.5471111 | −0.6295768 | $1.04106 \times 10^{-05}$ | $1.60066 \times 10^{-08}$ |
| STMN3      | 5.0020312 | −1.5332147 | −0.6165597 | $7.38251 \times 10^{-05}$ | $1.58224 \times 10^{-07}$ |
| APLP1      | 2.0131793 | −1.5242039 | −0.6080559 | 0.012101898               | $8.73966 \times 10^{-05}$ |
| ARHGAP19   | 3.2974718 | −1.5100202 | −0.5945678 | $9.07991 \times 10^{-05}$ | $2.03064 \times 10^{-07}$ |
| LFNG       | 32.122646 | −1.5018296 | −0.5867211 | 0                         | 0                         |
| MYE10OV    | 30.24067  | −1.484643  | −0.5701161 | $2.33249 \times 10^{-05}$ | $3.69495 \times 10^{-08}$ |
| KLF2       | 8.6816201 | −1.4806904 | −0.56627   | 0.000330067               | $8.61192 \times 10^{-07}$ |
| RNF208     | 11.395187 | −1.4771233 | −0.5627902 | 0.000787868               | $2.60628 \times 10^{-06}$ |
| PXMP4      | 1.127322  | −1.4722958 | −0.5580675 | 0.044897746               | 0.00050414                |
| RAPGEF3    | 1.8381585 | −1.4652467 | −0.5511436 | 0.000612097               | $1.88223 \times 10^{-06}$ |
| SERPINE1   | 63.31528  | −1.4636951 | −0.5496151 | $3.13132 \times 10^{-05}$ | $5.6334 \times 10^{-08}$  |
| MXD3       | 3.8955436 | −1.4620295 | −0.5479725 | 0.001334995               | $4.8364 \times 10^{-06}$  |
| CCDC106    | 6.5866855 | −1.4585538 | −0.5445386 | 0.000852784               | $2.88388 \times 10^{-06}$ |
| GATA2      | 2.0101656 | −1.457923  | −0.5439145 | 0.004132186               | $2.29106 \times 10^{-05}$ |
| R3HCC1     | 5.2778313 | −1.4517759 | −0.5378188 | 0.035773994               | 0.000366691               |
| SCN1B      | 2.3781562 | −1.4396957 | −0.525764  | 0.001764069               | $7.50817 \times 10^{-06}$ |
| POLI       | 1.7848536 | −1.4380746 | −0.5241385 | 0.002764208               | $1.31365 \times 10^{-05}$ |
| NBPF1      | 4.9701197 | −1.4299433 | −0.5159579 | 0.000644221               | $2.01103 \times 10^{-06}$ |
| RFX2       | 1.4123179 | −1.4274362 | −0.5134263 | 0.017716639               | 0.000146105               |
| ZMYM1      | 3.7041585 | −1.4258389 | −0.511811  | 0.001683559               | $6.94049 \times 10^{-06}$ |
| RAC3       | 13.332164 | −1.4221836 | −0.5081078 | 0.001764069               | $7.39985 \times 10^{-06}$ |
| ATP6V0E102 | 3.4938384 | −1.4175769 | −0.503427  | 0.001615678               | $6.3233 \times 10^{-06}$  |
| ARHGAP45   | 4.8875176 | −1.4173107 | −0.503156  | 0.001287236               | $4.55807 \times 10^{-06}$ |
| HEY1       | 3.9270783 | −1.4151551 | −0.5009602 | 0.007349404               | $4.6227 \times 10^{-05}$  |
| MMP2       | 5.7719836 | −1.4134266 | −0.499197  | 0.001334995               | $4.85159 \times 10^{-06}$ |
| GDF15      | 90.156067 | −1.4078665 | −0.4935106 | 0.000415222               | $1.12206 \times 10^{-06}$ |
| NUDT2      | 9.1059779 | −1.4025798 | −0.4880829 | 0.012726326               | $9.48708 \times 10^{-05}$ |
| MED18      | 9.6028118 | −1.3964581 | −0.4817723 | 0.004554416               | $2.59098 \times 10^{-05}$ |
| SLCO4A1    | 86.544771 | −1.3952363 | −0.4805095 | 0.000612097               | $1.87871 \times 10^{-06}$ |
| UPP1       | 43.500703 | −1.3942151 | −0.4794532 | 0.000852784               | $2.90049 \times 10^{-06}$ |
| NDRG4      | 1.2212974 | −1.3891881 | −0.474242  | 0.040557655               | 0.000439682               |
| LRWD1      | 8.9752133 | −1.385862  | −0.4707836 | 0.004074039               | $2.23984 \times 10^{-05}$ |
| ACBD4      | 4.6660307 | −1.3857521 | −0.4706692 | 0.011605952               | $7.99602 \times 10^{-05}$ |
| PRXL2B     | 14.631523 | −1.3840772 | −0.4689244 | 0.002249376               | $1.01658 \times 10^{-05}$ |
| BCAS4      | 1.7560515 | −1.3828828 | −0.4676789 | 0.012252473               | $9.07675 \times 10^{-05}$ |
| SWI5       | 7.8801276 | −1.3823838 | −0.4671583 | 0.012141742               | $8.88158 \times 10^{-05}$ |
| C11orf80   | 4.9101767 | −1.3817198 | −0.466465  | 0.013154817               | 0.000100517               |
| SAMD11     | 4.1138483 | −1.3813561 | −0.4660852 | 0.009555789               | $6.27762 \times 10^{-05}$ |
| HCFC1R1    | 58.036551 | −1.3793576 | −0.4639965 | 0.00190244                | $8.50926 \times 10^{-06}$ |
| CLYBL      | 1.521185  | −1.3773983 | −0.4619458 | 0.018663722               | 0.000159133               |
| CPT1A      | 6.8215074 | −1.3763497 | −0.4608471 | 0.002869063               | $1.39022 \times 10^{-05}$ |
| ADAM8      | 2.9436135 | −1.3758358 | −0.4603083 | 0.022291383               | 0.000201488               |
| PMVK       | 25.78381  | −1.3743182 | −0.4587161 | 0.003891974               | $2.10348 \times 10^{-05}$ |
| TUBB3      | 2.5561011 | −1.3725419 | −0.4568502 | 0.025952282               | 0.000255134               |
| PKIG       | 5.7431734 | −1.3723365 | −0.4566342 | 0.015413589               | 0.000122085               |
| ECHDC3     | 6.4487969 | −1.3712036 | −0.4554428 | 0.018374046               | 0.000154094               |
| KIF21B     | 1.0971491 | −1.370537  | −0.4547413 | 0.022483982               | 0.000204276               |
| BAIAP3     | 2.0430835 | −1.3697394 | −0.4539014 | 0.024651534               | 0.000236603               |
| DUSP7      | 1.9293368 | −1.366249  | −0.4502204 | 0.024619486               | 0.000235149               |
| CIRBP      | 9.1495226 | −1.3652002 | −0.4491126 | 0.003546285               | $1.86707 \times 10^{-05}$ |
| C6orf48    | 139.74739 | −1.3637103 | −0.4475372 | 0.002663366               | $1.24091 \times 10^{-05}$ |
| GADD45A    | 151.05564 | −1.360599  | −0.444242  | 0.00237182                | $1.09402 \times 10^{-05}$ |
| ETV5       | 10.566256 | −1.3584539 | −0.4419656 | $2.17045 \times 10^{-06}$ | $2.22476 \times 10^{-09}$ |
| P3H3       | 3.8694434 | −1.35129   | −0.4343373 | 0.040838917               | 0.00044537                |
| DGCR6L     | 14.802396 | −1.347824  | −0.4306321 | 0.019659855               | 0.000172887               |
| CSF2       | 80.397037 | −1.347348  | −0.4301225 | 0.006011785               | $3.55727 \times 10^{-05}$ |

|              |           |            |            |                           |                           |
|--------------|-----------|------------|------------|---------------------------|---------------------------|
| DHODH        | 4.5293432 | −1.3465417 | −0.4292589 | 0.01278058                | $9.70617 \times 10^{-05}$ |
| SHH          | 3.641638  | −1.3430299 | −0.4254914 | 0.022737729               | 0.000207641               |
| CERCAM       | 3.7249804 | −1.3425838 | −0.4250122 | 0.018468738               | 0.000155749               |
| BORCS8-MEF2B | 6.524934  | −1.3422244 | −0.4246259 | 0.037845636               | 0.000400268               |
| ATG16L2      | 2.8025101 | −1.3411854 | −0.4235087 | 0.022953005               | 0.000211746               |
| SGSH         | 5.2527593 | −1.3351016 | −0.4169495 | 0.025477173               | 0.000248089               |
| HMG3         | 20.456258 | −1.3350528 | −0.4168968 | 0.022291383               | 0.00020058                |
| GADD45B      | 54.375982 | −1.3348314 | −0.4166575 | 0.007715023               | $4.99645 \times 10^{-05}$ |
| RRM1         | 25.233437 | −1.3249384 | −0.4059253 | $6.15374 \times 10^{-06}$ | $7.74127 \times 10^{-09}$ |
| TMEM141      | 104.53879 | −1.3216079 | −0.4022943 | 0.01275308                | $9.56644 \times 10^{-05}$ |
| ID2          | 15.675748 | −1.3143769 | −0.394379  | 0.025217816               | 0.000244388               |
| ISY1-RAB43   | 7.5490906 | −1.3079611 | −0.3873197 | 0.028732105               | 0.000289155               |
| MIS18A       | 21.629514 | −1.3067631 | −0.3859976 | 0.032142087               | 0.00032497                |
| DUSP1        | 38.407407 | −1.3035254 | −0.3824187 | 0.022953005               | 0.000210952               |
| KLC2         | 7.1162806 | −1.3032929 | −0.3821614 | 0.035272828               | 0.000358267               |
| C1orf35      | 16.57029  | −1.3013424 | −0.3800006 | 0.049778025               | 0.000585903               |
| CTGF         | 15.637387 | −1.2866482 | −0.3636176 | 0.00059336                | $1.74168 \times 10^{-06}$ |
| FAM220A      | 18.726171 | −1.2256149 | −0.2935057 | 0.011605952               | $8.00299 \times 10^{-05}$ |
| EPHA2        | 44.257539 | −1.219349  | −0.2861111 | 0.004554416               | $2.61004 \times 10^{-05}$ |
| RAC2         | 41.50162  | −1.1876038 | −0.2480536 | 0.03924035                | 0.000416848               |
| GLUL         | 19.105368 | 1.18184361 | 0.24103914 | 0.044897746               | 0.000503905               |
| HERPUD1      | 29.616749 | 1.19380575 | 0.25556811 | 0.025905826               | 0.00025347                |
| STOM         | 31.923655 | 1.19631487 | 0.25859716 | 0.021917782               | 0.000196068               |
| ARSE         | 39.205333 | 1.19852239 | 0.26125686 | 0.018941275               | 0.000163264               |
| PRRC1        | 9.4756052 | 1.20296044 | 0.2665892  | 0.018361078               | 0.000152275               |
| IFI44        | 45.95535  | 1.20499206 | 0.26902365 | 0.016563327               | 0.000134278               |
| SOX4         | 15.198235 | 1.20556674 | 0.26971153 | 0.014808614               | 0.000115913               |
| RELA         | 29.676263 | 1.20955067 | 0.27447121 | 0.010412717               | $6.88909 \times 10^{-05}$ |
| PCYT2        | 7.7009137 | 1.21071978 | 0.275865   | 0.020737077               | 0.00018454                |
| TM4SF18      | 8.7748446 | 1.21467134 | 0.280566   | 0.023389833               | 0.000217955               |
| GDA          | 16.239425 | 1.21929611 | 0.28604853 | 0.006241095               | $3.80927 \times 10^{-05}$ |
| ME1          | 27.862148 | 1.22186971 | 0.28909045 | 0.005848439               | $3.43337 \times 10^{-05}$ |
| TMEM173      | 17.738439 | 1.22308407 | 0.29052357 | 0.018374046               | 0.000153553               |
| SMIM3        | 46.687096 | 1.22735294 | 0.29555017 | 0.003573375               | $1.89799 \times 10^{-05}$ |
| GBP1         | 34.39246  | 1.231758   | 0.30071885 | 0.002991478               | $1.47741 \times 10^{-05}$ |
| PRSS23       | 13.387782 | 1.23411417 | 0.30347586 | 0.003116351               | $1.5536 \times 10^{-05}$  |
| EPSTI1       | 25.419975 | 1.23624037 | 0.30595928 | 0.00277063                | $1.32961 \times 10^{-05}$ |
| PARVA        | 12.076202 | 1.24058931 | 0.3110256  | 0.001683559               | $6.93189 \times 10^{-06}$ |
| ACSL3        | 13.857028 | 1.2449747  | 0.31611642 | 0.001683559               | $6.98117 \times 10^{-06}$ |
| AKT1S1       | 24.076881 | 1.27407651 | 0.34945192 | 0.049778025               | 0.00058677                |
| FADS1        | 35.573    | 1.27432295 | 0.34973094 | 0.045085084               | 0.000508344               |
| STAT1        | 185.39399 | 1.27468885 | 0.35014513 | 0.042199594               | 0.000465979               |
| CYTH3        | 20.959698 | 1.28187963 | 0.3582608  | 0.042735473               | 0.000473887               |
| IL4I1        | 30.956015 | 1.28804972 | 0.36518828 | 0.037595883               | 0.0003928                 |
| FARP2        | 5.0415713 | 1.28982518 | 0.36717554 | 0.040838917               | 0.000447148               |
| CYP1B1       | 17.958778 | 1.29798479 | 0.37627348 | 0.024749577               | 0.000238697               |
| TGFB2        | 22.201368 | 1.29799017 | 0.37627946 | $3.13132 \times 10^{-05}$ | $5.56891 \times 10^{-08}$ |
| THBS1        | 345.51764 | 1.29842805 | 0.37676607 | 0.018941275               | 0.000162426               |
| ALDH1A1      | 160.73606 | 1.30098728 | 0.37960685 | 0.018663722               | 0.000158409               |
| IFI44L       | 25.386166 | 1.30673814 | 0.38597006 | 0.017329571               | 0.000142105               |
| LZTFL1       | 4.8227658 | 1.30753686 | 0.38685162 | 0.041896008               | 0.000460675               |
| SAA1         | 605.36156 | 1.30886415 | 0.38831536 | 0.014094441               | 0.00010901                |
| STAT2        | 19.512245 | 1.3109066  | 0.3905649  | 0.019062297               | 0.000165195               |
| CYP51A1      | 24.473022 | 1.31202355 | 0.39179361 | 0.017329571               | 0.000141438               |
| RABL3        | 10.776888 | 1.31218656 | 0.39197285 | $5.53143 \times 10^{-05}$ | $1.10819 \times 10^{-07}$ |
| SLC2A3       | 25.140245 | 1.31539108 | 0.3954918  | 0.01447703                | 0.000112643               |
| DHCR24       | 96.03053  | 1.31830252 | 0.39868148 | 0.01049093                | $7.0073 \times 10^{-05}$  |

|          |           |            |            |                           |                           |
|----------|-----------|------------|------------|---------------------------|---------------------------|
| ACSL1    | 33.440425 | 1.3188033  | 0.3992294  | 0.011630362               | $8.07401 \times 10^{-05}$ |
| ERBIN    | 8.930106  | 1.32130654 | 0.40196521 | 0.01278058                | $9.66267 \times 10^{-05}$ |
| TRAM2    | 23.389284 | 1.32167487 | 0.40236732 | 0.010761124               | $7.27001 \times 10^{-05}$ |
| KLHDC10  | 12.838222 | 1.32449477 | 0.40544215 | 0.011694365               | $8.17292 \times 10^{-05}$ |
| CTHRC1   | 14.94436  | 1.32745704 | 0.40866517 | 0.020737077               | 0.000184057               |
| BTN3A1   | 13.282612 | 1.32868249 | 0.40999639 | 0.011983256               | $8.48649 \times 10^{-05}$ |
| FDFT1    | 25.662912 | 1.33286937 | 0.41453539 | $2.07443 \times 10^{-06}$ | $2.02968 \times 10^{-09}$ |
| LAMA1    | 1.9078523 | 1.33425367 | 0.41603298 | 0.02428013                | 0.000230776               |
| STARD4   | 25.797936 | 1.33663258 | 0.41860294 | 0.006241095               | $3.80844 \times 10^{-05}$ |
| HERC6    | 10.580441 | 1.33663968 | 0.4186106  | 0.011453894               | $7.7914 \times 10^{-05}$  |
| OASL     | 7.2486285 | 1.33694223 | 0.41893712 | 0.016537627               | 0.0001333                 |
| DEPP1    | 51.120715 | 1.33724637 | 0.41926528 | 0.006475787               | $3.98269 \times 10^{-05}$ |
| KLHL4    | 2.9157967 | 1.33947501 | 0.42166767 | 0.023970952               | 0.000226721               |
| SHISA9   | 9.6924726 | 1.34124525 | 0.42357306 | 0.006052968               | $3.60984 \times 10^{-05}$ |
| PARP9    | 15.495934 | 1.34680391 | 0.42953981 | 0.00448326                | $2.52749 \times 10^{-05}$ |
| DDX60L   | 4.5064475 | 1.34848295 | 0.43133728 | 0.009090117               | $5.92935 \times 10^{-05}$ |
| EPC1     | 2.9422992 | 1.34916127 | 0.43206281 | 0.044588782               | 0.000496516               |
| RORA     | 1.8661734 | 1.35077787 | 0.43379045 | 0.039767496               | 0.0004243                 |
| C1S      | 25.637673 | 1.35187845 | 0.43496544 | $5.20431 \times 10^{-07}$ | $3.8013 \times 10^{-10}$  |
| EXT1     | 39.880415 | 1.35328778 | 0.43646867 | 0.002934887               | $1.43579 \times 10^{-05}$ |
| INHBA    | 8.4082864 | 1.35710045 | 0.44052751 | 0.004461049               | $2.49418 \times 10^{-05}$ |
| TRIM22   | 17.246668 | 1.35869776 | 0.44222456 | 0.003454897               | $1.78677 \times 10^{-05}$ |
| PTPN13   | 10.475304 | 1.35952538 | 0.44310308 | 0.012125257               | $8.81303 \times 10^{-05}$ |
| ZNF888   | 7.4121425 | 1.36165582 | 0.44536209 | 0.006241095               | $3.76164 \times 10^{-05}$ |
| OGDH     | 22.010168 | 1.36261108 | 0.44637384 | $2.21367 \times 10^{-07}$ | $1.34081 \times 10^{-10}$ |
| SQLE     | 33.370204 | 1.36313152 | 0.44692476 | $2.21367 \times 10^{-07}$ | $1.29182 \times 10^{-10}$ |
| LIPC     | 2.3458898 | 1.36749022 | 0.45153051 | 0.023345348               | 0.000216453               |
| ISG15    | 105.90986 | 1.36755144 | 0.4515951  | 0.002289688               | $1.04547 \times 10^{-05}$ |
| ARHGAP29 | 48.633831 | 1.36812138 | 0.45219623 | 0.001683559               | $6.92173 \times 10^{-06}$ |
| TMEM135  | 6.7876836 | 1.3691247  | 0.45325385 | 0.005155012               | $2.99104 \times 10^{-05}$ |
| TRIM6    | 12.158944 | 1.37107795 | 0.45531059 | 0.003205297               | $1.64275 \times 10^{-05}$ |
| DDX60    | 23.777613 | 1.37654141 | 0.46104802 | 0.001499862               | $5.66038 \times 10^{-06}$ |
| PPIF     | 54.887499 | 1.37673737 | 0.46125338 | 0.001548462               | $5.91594 \times 10^{-06}$ |
| SDC2     | 22.438613 | 1.37783404 | 0.46240212 | 0.001666525               | $6.59995 \times 10^{-06}$ |
| PIK3IP1  | 5.1520918 | 1.38002717 | 0.46469667 | 0.01049093                | $7.0386 \times 10^{-05}$  |
| MX1      | 104.72254 | 1.3821435  | 0.46690741 | 0.00096606                | $3.33078 \times 10^{-06}$ |
| RHOBTB1  | 10.176932 | 1.38499506 | 0.46988083 | 0.001867691               | $8.26682 \times 10^{-06}$ |
| HMGCR    | 10.192141 | 1.39089143 | 0.47600981 | 0.001480235               | $5.51618 \times 10^{-06}$ |
| DAB2     | 13.648162 | 1.39365421 | 0.47887264 | 0.001038039               | $3.62731 \times 10^{-06}$ |
| ACACA    | 16.963627 | 1.39396532 | 0.47919467 | 0.028666399               | 0.000287158               |
| OAS1     | 28.506122 | 1.39459161 | 0.47984271 | 0.000762215               | $2.41488 \times 10^{-06}$ |
| USP10    | 41.565511 | 1.39965272 | 0.48506891 | 0.000602553               | $1.79674 \times 10^{-06}$ |
| ACSS2    | 9.4475268 | 1.40490097 | 0.49046844 | 0.001480235               | $5.51734 \times 10^{-06}$ |
| IFIT1    | 11.666233 | 1.40793847 | 0.49358428 | 0.00076249                | $2.45128 \times 10^{-06}$ |
| CCDC80   | 8.86878   | 1.41371722 | 0.49949357 | 0.000385773               | $1.02451 \times 10^{-06}$ |
| LPIN1    | 6.099787  | 1.42679831 | 0.51278141 | 0.000516385               | $1.46762 \times 10^{-06}$ |
| CPA4     | 2.6951967 | 1.42722881 | 0.51321664 | 0.035997713               | 0.000370661               |
| FDPS     | 96.997493 | 1.42791041 | 0.51390547 | 0.000158392               | $3.98506 \times 10^{-07}$ |
| LUM      | 4.0863633 | 1.43221912 | 0.51825223 | 0.003148466               | $1.58428 \times 10^{-05}$ |
| OAS3     | 77.056061 | 1.4328178  | 0.51885516 | 0.003636633               | $1.94853 \times 10^{-05}$ |
| VAV3     | 2.5695434 | 1.43715551 | 0.52321618 | 0.001764069               | $7.56159 \times 10^{-06}$ |
| CMPK2    | 6.3659753 | 1.44169445 | 0.52776543 | 0.00059336                | $1.71612 \times 10^{-06}$ |
| IDI1     | 16.882639 | 1.44865437 | 0.53471342 | 0.000120123               | $2.79837 \times 10^{-07}$ |
| ALDOC    | 16.732156 | 1.45791359 | 0.54390521 | 0.000112428               | $2.56673 \times 10^{-07}$ |
| SAA2     | 52.105984 | 1.45919457 | 0.54517226 | $4.86642 \times 10^{-05}$ | $9.52288 \times 10^{-08}$ |
| FADS2    | 108.94194 | 1.46064703 | 0.54660759 | $2.98984 \times 10^{-05}$ | $4.87558 \times 10^{-08}$ |
| MSMO1    | 63.136926 | 1.46215017 | 0.54809149 | $2.72328 \times 10^{-12}$ | $8.88178 \times 10^{-16}$ |

|            |           |            |            |                           |                           |
|------------|-----------|------------|------------|---------------------------|---------------------------|
| FOLR1      | 4.868403  | 1.46334131 | 0.54926631 | 0.046265288               | 0.000528118               |
| LDLR       | 8.6478149 | 1.46603869 | 0.55192318 | $7.38662 \times 10^{-05}$ | $1.61753 \times 10^{-07}$ |
| ABCB1      | 2.1243776 | 1.47833981 | 0.56397792 | 0.01194582                | $8.40432 \times 10^{-05}$ |
| C21orf91   | 5.9352848 | 1.49248411 | 0.57771558 | $4.67609 \times 10^{-05}$ | $8.7147 \times 10^{-08}$  |
| LSS        | 25.053688 | 1.49794884 | 0.58298836 | $7.79339 \times 10^{-06}$ | $1.05301 \times 10^{-08}$ |
| IFI6       | 653.55003 | 1.50614892 | 0.59086443 | $3.59487 \times 10^{-06}$ | $3.8523 \times 10^{-09}$  |
| MYD88      | 10.41602  | 1.50861971 | 0.59322918 | $3.01461 \times 10^{-05}$ | $5.05642 \times 10^{-08}$ |
| AC138894.1 | 4.6244217 | 1.52447495 | 0.60831245 | $4.7683 \times 10^{-05}$  | $9.10871 \times 10^{-08}$ |
| HMGCS1     | 12.021151 | 1.5317055  | 0.61513894 | $5.37311 \times 10^{-06}$ | $6.50891 \times 10^{-09}$ |
| FASN       | 56.179095 | 1.53472112 | 0.61797652 | $8.92672 \times 10^{-07}$ | $7.48642 \times 10^{-10}$ |
| IFITM1     | 159.4943  | 1.5566074  | 0.63840512 | 0.000467312               | $1.30638 \times 10^{-06}$ |
| TNFSF13B   | 5.1932193 | 1.56431482 | 0.64553089 | $3.13132 \times 10^{-05}$ | $5.68985 \times 10^{-08}$ |
| CDKN2B     | 10.775216 | 1.58597614 | 0.66537106 | $5.20431 \times 10^{-07}$ | $3.87965 \times 10^{-10}$ |
| DHCR7      | 44.885843 | 1.60385524 | 0.68154393 | $3.54953 \times 10^{-08}$ | $1.81917 \times 10^{-11}$ |
| AL358113.1 | 2.2460744 | 1.61525253 | 0.69175973 | 0.001805238               | $7.82216 \times 10^{-06}$ |
| SLCO4C1    | 2.6843616 | 1.61850139 | 0.69465861 | $4.34903 \times 10^{-06}$ | $4.8631 \times 10^{-09}$  |
| PRUNE2     | 1.2288579 | 1.64390624 | 0.71712802 | 0.000132271               | $3.14301 \times 10^{-07}$ |
| OAS2       | 26.095007 | 1.69904572 | 0.76472468 | $1.28675 \times 10^{-10}$ | $5.39568 \times 10^{-14}$ |
| MX2        | 21.204493 | 1.74698682 | 0.80486873 | $1.99566 \times 10^{-11}$ | $7.43849 \times 10^{-15}$ |
| SCD        | 261.07007 | 1.79498177 | 0.8439692  | 0                         | 0                         |
| INSIG1     | 157.78608 | 1.85465018 | 0.8911471  | 0                         | 0                         |
| IGFBP5     | 1.1490406 | 1.91147515 | 0.93468644 | $6.06495 \times 10^{-05}$ | $1.24334 \times 10^{-07}$ |
| PARG       | 27.535989 | 1.94536738 | 0.96004263 | 0                         | 0                         |
| SLX1B      | 8.134409  | 3.09175035 | 1.62842383 | 0.01202901                | $8.57494 \times 10^{-05}$ |
